# Supplementary material for: Laparoscopic excision of deep rectovaginal endometriosis in BSGE endometriosis centres: a multicentre prospective cohort study
Source: PubMed Central journal article supplement — BMJ Open. 2018 Apr 9;8(4):e018924. doi: 10.1136/bmjopen-2017-018924 (PMC5892761; doi:10.1136/bmjopen-2017-018924), 2018-04-09
Supplement: bmjopen-2017-018924.draft_revisions.pdf [file bmjopen-2017-018924.draft_revisions.pdf]

# BMJ Open

BMJ Open is committed to open peer review. As part of this commitment we make the peer review history of every article we publish publicly available.

When an article is published we post the peer reviewers' comments and the authors' responses online. We also post the versions of the paper that were used during peer review. These are the versions that the peer review comments apply to.

The versions of the paper that follow are the versions that were submitted during the peer review process. They are not the versions of record or the final published versions. They should not be cited or distributed as the published version of this manuscript.

BMJ Open is an open access journal and the full, final, typeset and author-corrected version of record of the manuscript is available on our site with no access controls, subscription charges or pay-per-view fees (<http://bmjopen.bmj.com>).

If you have any questions on BMJ Open's open peer review process please email [editorial.bmjopen@bmj.com](mailto:editorial.bmjopen@bmj.com)

# BMJ Open

## Laparoscopic excision of deep rectovaginal endometriosis in BSGE Endometriosis Centres: A multicentre prospective cohort study

|                                 |                                                                                                                                                                                                                                                                                                                                                                                                                                |
|---------------------------------|--------------------------------------------------------------------------------------------------------------------------------------------------------------------------------------------------------------------------------------------------------------------------------------------------------------------------------------------------------------------------------------------------------------------------------|
| Journal:                        | <i>BMJ Open</i>                                                                                                                                                                                                                                                                                                                                                                                                                |
| Manuscript ID                   | bmjopen-2017-018924                                                                                                                                                                                                                                                                                                                                                                                                            |
| Article Type:                   | Research                                                                                                                                                                                                                                                                                                                                                                                                                       |
| Date Submitted by the Author:   | 01-Sep-2017                                                                                                                                                                                                                                                                                                                                                                                                                    |
| Complete List of Authors:       | Byrne, Dominic ; Royal Cornwall Hospitals Trust, Truro, Cornwall , Gynaecology<br>Curnow, Tamara; Bodriggy Health Centre, Hayle, Cornwall.<br>Smith, Paul; University of Birmingham,<br>Cutner, Alfred; University College London Hospitals, Gynaecology<br>Saridogan, Ertan; University College London Hospitals, Gynaecology<br>Clark, T; Birmingham Women's NHS Foundation Trust, Gynaecology;<br>University of Birmingham, |
| <b>Primary Subject Heading</b>: | Obstetrics and gynaecology                                                                                                                                                                                                                                                                                                                                                                                                     |
| Secondary Subject Heading:      | Obstetrics and gynaecology                                                                                                                                                                                                                                                                                                                                                                                                     |
| Keywords:                       | Laparoscopy, bowel endometriosis, deep infiltrating endometriosis, rectal endometriosis, rectovaginal endometriosis                                                                                                                                                                                                                                                                                                            |
|                                 |                                                                                                                                                                                                                                                                                                                                                                                                                                |

SCHOLARONE™  
Manuscripts

only

**Title**

Laparoscopic excision of deep rectovaginal endometriosis in BSGE Endometriosis Centres:  
A multicentre prospective cohort study

D Byrne, T Curnow, P Smith, A Cutner, E Saridogan, TJ Clark

Mr Dominic Byrne, MB BS, MD FRCOG, Consultant Gynaecologist, Royal Cornwall  
Hospitals Trust, Truro, Cornwall

Dr Tamara Curnow, DPhil, DRCOG, MMath, MRCP, GP Partner, Bodriggy Health Centre,  
Hayle, Cornwall.

Mr Paul Smith, PhD, MB ChB, MRCOG, NIHR Clinical Lecturer, Birmingham Women's NHS  
Foundation Trust, and School of Clinical and Experimental Medicine,

Mr Alfred Cutner, MD FRCOG, Consultant Gynaecologist, University College London  
Hospitals

Mr Ertan Saridogan, PhD, FRCOG, Consultant Gynaecologist, University College London  
Hospitals

Professor T. Justin Clark, MB ChB, MD, FRCOG, Consultant Obstetrician and  
Gynaecologist and Honorary Professor, Birmingham Women's NHS Foundation Trust and  
University of Birmingham, (corresponding author) on behalf of the BSGE Endometriosis  
centres Scientific Advisory Group

Address for correspondence: Professor T. Justin Clark, Consultant Obstetrician and  
Gynaecologist and Honorary Professor, Birmingham Women's NHS Foundation Trust and  
University of Birmingham, Birmingham, B15 2TG

E-mail: [t.j.clark@doctors.org.uk](mailto:t.j.clark@doctors.org.uk)

Tel: 0044 121 607 4712

## Abstract

Objective: To estimate the effectiveness and safety of laparoscopic surgical excision of rectovaginal endometriosis.

Design: A multicentre, prospective cohort study

Setting: 51 hospitals accredited as specialist Endometriosis Centres.

Participants: 5,162 women of reproductive age with rectovaginal endometriosis of which 4,721 women had planned laparoscopic excision.

Interventions: Laparoscopic surgical excision of rectovaginal endometriosis requiring dissection of the para-rectal space.

Main outcome measures: Standardised symptom questionnaires enquiring about chronic pelvic pain, bladder and bowel symptoms, analgesia use and quality of life measured using the EuroQol instrument completed prior to surgery and at 6, 12 and 24 months post-operatively. Serious peri- and post-operative complications including major haemorrhage, infection and visceral injury were recorded.

Results: At 6 months post surgery there were significant reductions in premenstrual, menstrual and non-cyclical pelvic pain, deep dyspareunia, dyschezia, low back pain and bladder pain. In addition, there were significant reductions in voiding difficulty, bowel frequency, urgency, incomplete emptying, constipation and passing blood. These reductions were maintained at two years, with the exception of voiding difficulty. Global quality of life significantly improved from a median pre-treatment score of 55/100 to 80/100 at six months, as well as a significant improvement in quality of life in all measured domains. These improvements were sustained at two years. All analgesia use was reduced and in particular opiate use fell from 28.1% prior to surgery to 16.1% at six months. The overall incidence of complications was 6.8% (321/4721). Gastrointestinal complications (enterotomy,

1  
2  
3 anastomotic leak or fistula) occurred in 52 (1.1%) operations and of the urinary tract (ureteric  
4 / bladder injury or leak) in 49 (1.0%) procedures.

6  
7 Conclusion: Laparoscopic surgical excision of rectovaginal endometriosis appears to be  
8 effective in treating pelvic pain and bowel symptoms and improving health-related quality of  
9 life and has a low rate of major complications when performed in specialist centres.  
10  
11

12  
13  
14 Keywords: Laparoscopy; bowel endometriosis; deep infiltrating endometriosis; rectal  
15 endometriosis; rectovaginal endometriosis  
16  
17  
18  
19  
20  
21  
22  
23  
24  
25  
26  
27  
28  
29  
30  
31  
32  
33  
34  
35  
36  
37  
38  
39  
40  
41  
42  
43  
44  
45  
46  
47  
48  
49  
50  
51  
52  
53  
54  
55  
56  
57  
58  
59  
60

### Article summary – Strengths and limitations

- Our study is by far the largest , multcentre observational cohort published for the laparoscopic surgical treatment of rectovaginal endometriosis with a sample of nearly 5000 cases.
- Data were prospectively collected, minimising missing data and recall bias, were obtained from multiple centres enhancing transferability, and outcomes measurements were patient reported reducing interpreter bias.
- Efficacy outcomes were assessed in both the short term (at six months) and longer term (at two years) following surgery. In addition, the scale of these data and the method of collection have enabled a robust assessment of the risk of complications from this type of surgery. The reported incidence of complications cannot however, be used as indicative risk for patients who have care given in non-specialist endometriosis centres.
- The main limitation of our study relates to missing data from incomplete data entry, incomplete follow-up or uncompleted follow up at closure of the study. We performed sensitivity analyses to explore the robustness of our results to incomplete. The results were stable, remaining significant in some cases even when symptomatic outcomes for those women with missing data were assumed to be the worst possible outcome.
- The study would have benefited from a non-surgically treated control group, however, denying surgery to a group of women with severe, refractory symptoms makes the conduct of such a study problematic and of questionable feasibility. Thus historical control data were used from the same patients prior to surgical intervention.

## Introduction

Endometriosis is a common and serious problem for women in their reproductive years and can cause chronic pelvic pain, subfertility, bowel and urinary dysfunction.<sup>1</sup> The associated morbidity places a substantial economic burden on society as a result of direct healthcare costs and indirect productivity losses. In the USA, direct healthcare costs have been estimated to be \$2,801 annually per patient with an additional cost of \$1,023 annually per patient due to loss of productivity. Overall the costs associated with endometriosis in the USA are estimated at 22 billion dollars per annum.<sup>2</sup>

Deep endometriosis in the posterior pelvis frequently affects the space between the anterior wall of the rectosigmoid and the posterior vaginal wall and is usually referred to as rectovaginal endometriosis. There is limited evidence supporting the sustained effectiveness and acceptability of medical therapies in improving the symptoms of rectovaginal endometriosis.<sup>3-5</sup> Consequently surgical treatment has been proposed to completely excise the deep rectovaginal disease.<sup>6-8</sup>

Advances in instrumentation and surgical experience have led to laparoscopic treatment superseding alternative surgical routes such as laparotomy and transvaginal excision. Previous studies have reported improvements in generic quality of life data following surgical excision of endometriosis involving the bowel, but these evaluations have been undertaken using small cohorts of women usually from single centres, affecting the precision and generalisability of the derived results.<sup>9-11</sup> Whilst these findings of improved symptomatic outcomes are promising, it is well recognised that surgery for deep endometriosis with bowel involvement is complex and can be associated with serious and potentially life threatening complications.<sup>10</sup> For these reasons, the ESHRE Guidelines on the 'Management of women with endometriosis' recommend that clinicians refer women with suspected or diagnosed

1  
2  
3 deep endometriosis to a centre of expertise that offers all available treatments in a  
4 multidisciplinary context.<sup>1</sup>  
5  
6  
7

8  
9 In 2006 the British Society for Gynaecological Endoscopy (BSGE) developed specialist  
10 endometriosis centres (Endocentres), where patients would be treated by surgeons who  
11 work in multidisciplinary teams, audit their outcomes and perform sufficient workload to  
12 maintain their surgical skills.<sup>12</sup>  
13  
14  
15

16  
17  
18 In view of the paucity of world literature data pertaining to the effectiveness and safety of this  
19 highly complex surgery for a common gynaecological condition, we undertook a prospective,  
20 multi-centre cohort study to estimate (i) effectiveness of surgery on patient reported  
21 symptoms associated with endometriosis as well as its impact upon women's health related  
22 quality of life and (ii) safety by examining rates of surgical complications using data collected  
23 from the BSGE Endocentres dataset.  
24  
25  
26  
27  
28  
29  
30  
31  
32

### 33 **Methods**

#### 34 *Study design*

35  
36  
37  
38 A multicentre prospective cohort study of pre-menopausal women undergoing surgery for  
39 pelvic pain associated with rectovaginal disease resistant to medical treatment or  
40 conservative surgical therapy rectovaginal disease was performed. Standardised diagnostic,  
41 operative, histological and patient outcome data were prospectively collected from 51 BSGE  
42 Endometriosis centres between 1<sup>st</sup> January 2009 and 30<sup>th</sup> June 2016.  
43  
44  
45  
46  
47  
48

#### 49 *Study population*

50  
51 Women treated in a BSGE Endocentre who underwent laparoscopic excision of deep  
52 rectovaginal endometriosis, which required dissection of the pararectal space and gave  
53 written consent for data collection were included in the study. Dissection of the pararectal  
54  
55  
56  
57  
58  
59  
60



1  
2  
3 space was chosen as the inclusion criterion for cases to be studied because access to this  
4 anatomical space is necessary to free adherent bowel prior to excision of deep rectovaginal  
5 disease. Furthermore, this operative step is necessary irrespective of the type of surgery  
6 performed on the bowel. So by choosing this step of the surgical procedure the BSGE could  
7 be assured that all cases of deep rectovaginal endometriosis would be included reducing the  
8 risk of selection bias. Clear explanation of dissection of the deep pararectal space is  
9 provided on the BSGE endometriosis database for surgeons. Whilst there have been a  
10 number of historical scoring systems for endometriosis, some were not developed prior to  
11 the inception of the BSGE project and none have been universally accepted.<sup>13-16</sup> In order to  
12 retain accreditation as a BSGE Endocentre, all consenting patients who undergo surgery for  
13 deep rectovaginal endometriosis that includes dissection of the pararectal space in an  
14 Endocentre must have their data entered on to the BSGE national endometriosis database.

#### 25 26 27 *Clinical data*

28  
29 Standardised patient symptom data and quality of life (QoL) assessments were collected  
30 prior to surgery as a baseline control. The assessments were repeated at six months, one  
31 year and two years after surgery. To ensure consistent timing of follow-up, the database only  
32 accepts post-operative data entry within an interval from four weeks before the exact date  
33 required and up to eight weeks after the exact date.

34  
35 All patients recorded their clinical symptoms on a BSGE standard questionnaire using a 0-10  
36 point Likert scale for premenstrual pain, menstrual pain, non cyclical pelvic pain, deep  
37 dyspareunia, cyclical dyschezia, non cyclical dyschezia, lower back pain, bladder pain and  
38 voiding difficulty. In addition, patients recorded details of bowel function with graded  
39 answers for; frequency of bowel movement, urgency of bowel movement, incomplete  
40 emptying sensation, constipation and blood in the stool. Patient reported quality of life data  
41 were collected using EuroQuol 5D questionnaire and EuroQuol Visual Analogue Score.<sup>17,18</sup>

42  
43  
44  
45  
46  
47  
48  
49  
50  
51  
52  
53  
54  
55 Dichotomous data ('yes or 'no') were collected for use of analgesia (paracetamol, non  
56  
57  
58  
59  
60

steroidal anti-inflammatory drug (NSAID) or opiates) and medical therapy (oral contraceptive pill, Mirena Intrauterine system™ (Bayer, Germany), GNRH analogues alone, GNRH analogues plus add back hormone replacement, systemic progestogens or aromatase inhibitors).

### *Surgical data*

Details of previous endometriosis surgery were recorded including adnexal surgery and hysterectomy. Surgical details were collected using a standard dataset describing the name and level of the surgeon, whether a colorectal and/or a urological surgeon also undertook the surgery and whether the surgery was laparoscopic or laparotomic. The distribution of any endometriosis deposits was described by 'yes' or 'no', for right and left pelvic side-wall, right and left endometrioma, right and left uterosacral ligament and obliteration of the pouch of Douglas. Bowel involvement of endometriosis was also recorded dichotomously for 'rectal involvement', 'rectovaginal nodule', or involvement of 'appendix', 'small bowel' and 'rectosigmoid'. Co-existent bladder endometriosis was recorded by yes or no for superficial bladder, deep bladder and deep utero-vesical endometriosis.

The surgeon recorded the surgical procedure for each of the above areas of distribution of endometriosis from a list of; 'ablated', 'excised', 'ablated and excised', 'not treated' or 'not present'. Surgery on any endometrioma present was recorded by selecting from a list of; 'ablated', 'excised', 'oophorectomy', 'drained only', 'not treated' or 'not applicable'.

Pararectal space dissected was recorded as yes or no. Surgery on a rectovaginal nodule was recorded as 'ablated', 'excised', 'not treated' or 'not applicable'. Opening of the vagina as part of the surgery was recorded as 'yes', 'no' or 'not applicable'. The type of bowel surgery was recorded by selecting from a list of; 'not applicable', 'not treated', 'shaved', 'disc resection' or 'segmental resection', along with whether a stoma was formed, or not. Surgery on any bladder endometriosis was recorded as; 'ablated', 'excised without bladder opening', 'excised with bladder opening', 'not present' or 'not treated'. Ureteric endometriosis surgery

1  
2  
3 was described by ureteric nodule excised (yes, no or not present), right ureterolysis (yes, no  
4 or not applicable), left ureterolysis (yes, no or not applicable), JJ stent (yes or no). Finally,  
5 data were collected regarding performance of a concomitant hysterectomy (yes, no or not  
6 applicable) with space for free text.  
7  
8  
9

10  
11 Recording of complications was divided into two sections with 'yes' or 'no' answers for a  
12 standardised list of perioperative and post operative complications. Complication data  
13 included surgical injury to urological, gastrointestinal or vascular structures, unplanned  
14 procedures including conversion to laparotomy, infective morbidity, pulmonary embolism and  
15 death. Histology of removed specimens was examined for malignant transformation.  
16  
17  
18  
19

### 20 21 22 *Statistical Methods* 23

24 Data were analysed according to the study eligibility criteria, namely: a valid operation date  
25 was entered, the intended operation was via a laparoscopy, the para-rectal space was  
26 dissected and there was excision of endometriosis. If duplicate data were present, the most  
27 complete dataset was used. Centres which entered fewer than 20 cases in the total study  
28 period were excluded.  
29  
30  
31  
32  
33

34 Non-numerical scores (eg: bowel symptoms) and the EuroQuol 5D-3L were coded  
35 numerically with an assumed underlying interval scale. For the patient reported data, pair-  
36 wise comparisons were made using the baseline pre-operative data as a control. We also  
37 compared the symptom scores at six months with those at two years to assess the post-  
38 operative trend. Data were thus only included if both the pre-operative and the relevant post-  
39 operative data were entered. The Mann Whitney U test (Wilcoxon rank sum) was used for  
40 comparison for data with more than two outcomes and the sign test for dichotomous data. A  
41 statistic was considered significant if the probability of it occurring by chance was  $<0.05$  on a  
42 two-tailed test.  
43  
44  
45  
46  
47  
48  
49  
50  
51

52  
53 As post-operative follow-up was incomplete, the impact of this was assessed in two ways.  
54 The first method was by restricting the analysis to centres with more complete follow-up;  
55  
56  
57  
58  
59

1  
2  
3 defined as centres performing at least 50 operations in the study period, with more than 90%  
4 of pre-operative questionnaires and more than 70% of post-operative questionnaires entered  
5 onto the BSGE database for at least one post-operative clinical follow-up period. The second  
6 method was to include all women for whom a pre-operative, baseline score was present (the  
7 controls) and use the reported post-operative results if present, but to assign a score for  
8 those patients with missing post-operative follow up data. The assigned score was the  
9 same for all patients with missing data. It was initially assigned as the best outcome possible  
10 and the significance calculation repeated. The assigned score was then changed stepwise  
11 through less desirable outcomes. The last value of the assigned score at which the outcome  
12 is still significant gives a measure of the sensitivity of the result to the missing data. If, for  
13 example, the statistic is still significant with the worst possible outcome assigned to the  
14 missing post-operative dataset then the outcome is effectively independent of the missing  
15 responses.

16  
17  
18  
19  
20  
21  
22  
23  
24  
25  
26  
27  
28  
29 The data analysis was performed using Matlab (MathWorks) version R2011b.  
30  
31  
32  
33

## 34 **Results**

35  
36  
37  
38  
39 In BSGE Endocentres between 1<sup>st</sup> Jan 2009 and 30<sup>th</sup> June 2016, 5,162 women underwent  
40 surgery for deep rectovaginal endometriosis, which included dissection of the pararectal  
41 space. Women who underwent planned laparotomy (160; 3.1%), only had ablative  
42 treatment of their endometriosis (100; 1.9%), or had no treatment of their endometriosis  
43 (181; 3.5%) were excluded from further analysis. Thus a total of 4,721 women had planned  
44 laparoscopic excision of deep rectovaginal endometriosis in a total of 51 Endocentres.  
45  
46  
47  
48  
49  
50  
51  
52  
53  
54  
55  
56  
57  
58  
59  
60  
Previous surgery for endometriosis had been performed in 55.1% (2,602) of these women,  
with 7.0% (333) having had one ovary removed, 3.0% (141) both ovaries removed and 5.0%

1  
2  
3 (234) having had a hysterectomy. The median age of women having surgery was 35.1 years  
4  
5 (90<sup>th</sup> centile range 25.9 - 44.8 years).

### 6 7 *Surgical findings and procedures*

8  
9  
10 At surgery endometriosis was identified on the left pelvic side wall in 69.0% (3,259) patients  
11  
12 and on the right side wall in 57.7% (2,726). It was on the left uterosacral ligament in 78.4%  
13  
14 (3,702) patients and the right uterosacral ligament in 70.8% (3,341). The pouch of Douglas  
15  
16 was obliterated in 67.1% (3,167) women and a rectovaginal nodule present in 68.6% (3,238)  
17  
18 women. There was endometriosis present on the rectum in 54.7% (2,582) women, the  
19  
20 caecum in 1.3% (60) women, the appendix in 2.3% (110) women, small bowel in 1.6% (75)  
21  
22 women and rectosigmoid in 18.1% (856) women. Deep uterovesical disease was present in  
23  
24 422 women (8.9%).

25  
26 Gonadotrophin releasing hormone agonists were given to 23.0% (1087) women prior to  
27  
28 surgery. The operation was undertaken by a senior gynaecologist in 96.4% (4,549) cases  
29  
30 and a colorectal surgeon was present in 27.6% (1,304) cases and a urologist in 320 (6.8%)  
31  
32 cases. Pararectal dissection was performed in all cases and ureterolysis on the left in  
33  
34 65.5% (3,092) and on the right in 57.1% (2,695) cases. A ureteric nodule of endometriosis  
35  
36 was excised in 9.0% (424) and JJ ureteric stents used in 9.2% (434) cases. Bowel surgery  
37  
38 was performed in 63.1% (2,981) cases and 1.3% (62) women had a stoma. A hysterectomy  
39  
40 was performed in 723 (15.3%) women. Conversion to laparotomy occurred in 41 (0.9%)  
41  
42 cases. There were no cases of malignancy in any of the endometriosis specimens.

### 43 44 45 *Follow up performance*

46  
47 Whilst preoperative data were expected in 4,721 women, symptom data were available for  
48  
49 4,210 (89%) and QoL data for 4,041 (86%) women. At six months follow up symptom scores  
50  
51 were available in 2,350 (50%) and QoL scores in 2241 (47%) of women. At one year post  
52  
53 operation, data were expected for 3,977 women, of whom symptom data were present in  
54  
55  
56  
57  
58  
59  
60

1  
2  
3 1499 (38%) and QoL in 1380 (35%). At two years symptom data were present in 729 (27%)  
4 and QoL data in 644 (24%) out of a possible 2,704 women.  
5  
6

7 In the seven endocentres with most complete follow up; preoperative symptom data were  
8 available for 684 (97%) of the 707 women and QoL data for 668 (94%) women. At six  
9 months symptom data were present for 537 (76%) and QoL data for 530 (75%) women. At  
10 one year post surgery, data were expected from 553 women and symptom data were  
11 present in 356 (64%) and QoL in 347 (63%) women. At two years post operation data were  
12 expected in 319 women and symptom data were present for 160 (50%) and QoL data in 145  
13 (45%) women.  
14  
15  
16  
17  
18  
19  
20  
21

### 22 *Symptom outcomes*

23  
24 At six months after laparoscopic excision of endometriosis there was a significant reduction  
25 in pain scores for premenstrual pain (from a median of 7/10 to 3/10), menstrual pain (from  
26 9/10 to 4/10) and non cyclical pelvic pain (from 6/10 to 2/10) when compared to pre-  
27 operative scores. A significant reduction in pain scores also occurred for deep dyspareunia  
28 (from 5.5/10 to 1/10), cyclical (6/10 to 0/10) and non-cyclical dyschezia (3/10 to 0/10), low  
29 back pain (6/10 to 3/10) and a statistically significant drop in bladder pain although no  
30 change in the median score. In addition, there was a statistically significant (although not  
31 clinically significant) reduction in voiding difficulty, bladder pain, bowel frequency, bowel  
32 urgency, incomplete bowel emptying, constipation and passing blood in the stool (see table  
33 1).  
34  
35  
36  
37  
38  
39  
40  
41  
42  
43  
44

45 The same significant reduction in symptoms remained present at two years post surgery for  
46 all symptoms except voiding difficulty. A comparison of the reduction in symptoms at six  
47 months was made with the reduction in symptoms at two years in order to assess the post-  
48 operative trend in symptom scores. This showed that there was a statistically significant but  
49 clinically small increase in all symptoms except voiding difficulty over the 18 months (see  
50 table 1).  
51  
52  
53  
54  
55  
56  
57  
58  
59  
60

1  
2  
3 Patient reported QoL for all five domains of the EuroQol questionnaire showed a significant  
4 improvement in QoL at six months post surgery that was sustained at two years post  
5 surgery. In particular, the median global QoL on a 100 point visual analogue scale improved  
6 from 55 pre-operatively to 80 post-operatively. There was no statistically significant  
7 degradation in effect between 6 and 24 months in all measured QoL domains with the  
8 exception of the visual analogue score, which showed a statistically significant (although  
9 clinically negligible) lessening over this timeframe (see table 2, median score dropped from  
10 80/100 to 76/100).  
11  
12  
13  
14  
15  
16  
17

18  
19 Analgesia use was significantly reduced at six and 24 months post surgery compared to pre-  
20 operative levels for all three analgesic types. Paracetamol use dropped from 76.0% patients  
21 to 59.8% at 6 months, NSAID use dropped from 69.8% patients to 48.9% at 6 months and  
22 opiate use dropped from 28.1% patients to 16.1% at 6 months. There was however a  
23 statistically significant (although clinically small) increase in paracetamol, NSAID and opiate  
24 use between six and 24 months post-operatively (see table 3).  
25  
26  
27  
28  
29  
30

### 31 *Sensitivity analyses*

32  
33 Sensitivity analysis on the reduction of patient reported symptoms and the improvement in  
34 quality of life post surgery was used to estimate the effect of any incomplete data on the  
35 significance of the results and is shown in table 4. For all symptoms except voiding difficulty,  
36 constipation and blood in the stool, the median scores for missing post-operative data would  
37 have to be higher (worse) than at baseline for change in scores to become statistically non-  
38 significant. Indeed, menstrual pain scores at six months remained significantly improved on  
39 the pre-operative scores even if all the missing six month scores are assumed to be 10  
40 (maximum pain). To further test the robustness of the data to missing values, data from the  
41 seven centres with the best follow-up were analysed separately (see table 5, supplementary  
42 tables 1-3). Improvement in premenstrual pain, menstrual pain, non-cyclical pelvic pain,  
43 deep dyspareunia, cyclical dyschezia, lower back pain and EQ-VAS were all statistically  
44 significant regardless of missing data.  
45  
46  
47  
48  
49  
50  
51  
52  
53  
54  
55  
56  
57  
58  
59  
60

### *Surgical complications*

The overall incidence of complications was 6.8% (321), with perioperative complications in 4.7% (220) operations and late operative complications in 2.5% (120) women, including 19 women suffering both peri, and postoperative complications (see table 6). Bowel complications occurred in 1.1% (52 operations) and the incidence varied according to whether bowel surgery was undertaken and if so, what type of procedure; 0.6% (11) where no coexistent bowel surgery was undertaken, 1.1% (29), with bowel shaving, 9.3% (5) with disc resection and 3.9% (7) with segmental bowel resection (see table 7).

## **Discussion**

### *Statement of principal findings*

Laparoscopic excision of severe rectovaginal endometriosis, performed in specialist centres in women with chronic pelvic pain, was associated with significant reduction in pain symptoms and improved health related quality of life. Moreover, the reduction in pain and increased quality of life observed six months following surgery was maintained at two years. All types of pain symptoms improved; pre-menstrual pain, menstrual pain, non-cyclical pain, back pain, pain with sexual intercourse, voiding and on opening the bowels. A significant reduction in the need for analgesia supported the findings of an overall reduction in pain symptoms. Bowel symptoms including frequency, urgency, incomplete emptying and constipation also improved. This type of surgery requires enhanced laparoscopic skills, primarily because of the need to overcome distorted anatomy and operate in proximity to delicate gastrointestinal, genitourinary and vascular structures. However, clinical outcomes were good, and the rates of serious peri-operative and late complications were low, when laparoscopic excision of rectovaginal endometriosis was conducted in recognised, specialist centres.

### *Strengths and weaknesses of the study*



1  
2  
3 Our study has many strengths which include the size of the sample with nearly 5000 cases,  
4 the largest dataset by far reported to date in the world literature. These data were collected  
5 prospectively, minimising missing data and recall bias, were obtained from multiple centres  
6 enhancing transferability, and outcomes measurements were patient reported reducing  
7 interpreter bias. Efficacy outcomes were assessed in both the short term (at six months) and  
8 longer term (at two years) following surgery. In addition, the scale of these data and the  
9 method of collection have enabled a robust assessment of the risk of complications from this  
10 type of surgery. Precise estimates of efficacy of surgery and associated complication rates  
11 to inform clinical decision making have been lacking because relevant data available in the  
12 literature have been derived from small, single centre case series<sup>9,10,19,20</sup> and in many such  
13 publications the severity of endometriotic disease has been heterogeneous or not  
14 defined.<sup>9,10,19,20</sup> We are aware of no other data set that has examined the laparoscopic  
15 management of rectovaginal endometriosis when it is applied across a country according to  
16 accepted best practice and within nationally approved guidance<sup>6</sup>. Although there may be  
17 some units in the UK that do not submit data to the BSGE national database, this would be  
18 the exception for any NHS unit carrying out large volumes of surgery as this has become the  
19 standard for commissioning of endometriosis services by NHS England.  
20  
21  
22  
23  
24  
25  
26  
27  
28  
29  
30  
31  
32  
33  
34  
35

36  
37 The main limitation of our study relates to missing data from incomplete data entry,  
38 incomplete follow-up or uncompleted follow up at closure of the study. We performed  
39 sensitivity analyses to explore the robustness of our results to incomplete follow up. The  
40 results were stable, remaining significant in some cases even when symptomatic outcomes  
41 for those women with missing data were assumed to be the worst possible outcome.  
42  
43 Furthermore, when we restricted analysis to the seven centres providing the most complete  
44 follow-up, the observed improvement in clinical symptoms and quality of life were  
45 reproduced. Thus, it is unlikely that the impact of missing data would substantially alter  
46 clinical inferences on the efficacy of laparoscopic surgery for severe rectovaginal  
47 endometriosis. The study would have benefited from a non-surgically treated control group,  
48  
49  
50  
51  
52  
53  
54  
55  
56  
57  
58  
59  
60

1  
2  
3 however, denying surgery to a group of women with severe, refractory symptoms makes the  
4  
5 conduct of such a study problematic and of questionable feasibility. Thus historical control  
6  
7 data were used from the same patients prior to surgical intervention.

8  
9 Despite the complexity of the surgery, the overall reported perioperative and post-operative  
10  
11 serious complication rates were relatively low at 4.7% and 2.5% respectively. Conversion to  
12  
13 laparotomy occurred in less than 1% of cases demonstrating advances in acquisition of  
14  
15 laparoscopic surgical skills, training and equipment. Excision of endometriosis in the  
16  
17 posterior pelvis is a difficult surgical procedure but the improved vision and precision that  
18  
19 laparoscopy provides may improve completeness of excision and, in skilled hands, minimise  
20  
21 the risk of complications. The ureteric injury rate of 0.5% was similar to those reported in  
22  
23 smaller series from single centres and that associated with hysterectomy.<sup>21</sup> Bowel trauma,  
24  
25 namely unintended bowel injuries, leaking from bowel surgery and recto-vaginal fistula  
26  
27 formation occurred in 1.2% of cases. In the context of the morbidity associated with  
28  
29 rectovaginal endometriosis, its resistance to conventional medical treatments and the  
30  
31 nature, complexity and efficacy of surgery, this rate of complications appears to be  
32  
33 acceptable. Moreover, the rates of adverse events are comparable to other series from  
34  
35 expert, single centres.<sup>19-21</sup> The reported incidence of complications cannot however, be  
36  
37 used as indicative risk for patients who have care given in non-specialist endometriosis  
38  
39 centres.

40  
41  
42 *Strengths and weaknesses in relation to other studies, discussing important differences in*  
43  
44 *results*

45  
46 The findings from the current study which is the largest, multicentre series by far to be  
47  
48 reported to date, are in keeping with those published from smaller, single centre  
49  
50 observational cohorts of women undergoing laparoscopic excision of deep endometriosis.  
51  
52 Significant reductions in the intensity of chronic pelvic pain, dysmenorrhoea, dyspareunia  
53  
54 and dyschezia were reported from series in the UK (57 and 137 women)<sup>11,20</sup>, Finland (22  
55  
56 women)<sup>19</sup>. The majority of studies included in a recent extensive literature review of surgical  
57  
58

1  
2  
3 treatment of deep endometriosis with colorectal involvement also reported improvements in  
4 pain and digestive symptoms as well as health related quality of life, although few studies  
5 reported this latter outcome.<sup>10</sup> The size of the 49 included studies ranged from four to 283  
6 cases and the total number of operations evaluated were 1791 of which 679 (38%) were  
7 rectal shaving procedures, 375 (21%) disc resections and 737 (41%) segmental resections.  
8 However, comparisons between studies were not possible because of inadequate reporting  
9 (many included studies reported 'overall improvement'), as well as inconsistent assessment,  
10 of clinical outcomes (e.g. use of interviews, bespoke questionnaires, visual analogue  
11 scales). A systematic review of 34 articles describing 1889 segmental bowel resections also  
12 showed that the vast majority of women had significant improvement in chronic pelvic pain,  
13 dysmenorrhea, dyspareunia and dyschezia at one year<sup>9</sup>.

14  
15  
16  
17  
18  
19  
20  
21  
22  
23  
24  
25 Safety, in addition to efficacy is necessary to justify undertaking complex laparoscopic  
26 procedures for a benign pathology albeit a condition associated with substantial morbidity.  
27 Haemorrhage greater than one litre was the most common peri-operative complication  
28 occurring in 0.9% of cases. This rate is consistent with the available literature where  
29 haemorrhage requiring blood transfusion in complicated procedures (0.3%-3.1%) depending  
30 upon the type of bowel surgery.<sup>10</sup> Similarly our peri-operative and post-operative  
31 complication rates were comparable to the mean (range) of complications reported within a  
32 recent review of 49 case series<sup>10</sup>: rectovaginal fistulae 0.3% vs. 2.7% (0%-11%);  
33 enterostomy 0.5% vs. 1.2% (0.0% - 7.0%) and pelvic abscess 0.4% vs. 0.3% (0.0% - 4.0%).  
34  
35  
36  
37  
38  
39  
40  
41  
42  
43  
44  
45  
46  
47  
48  
49  
50  
51  
52  
53  
54  
55  
56  
57  
58  
59  
60  
61  
62  
63  
64  
65  
66  
67  
68  
69  
70  
71  
72  
73  
74  
75  
76  
77  
78  
79  
80  
81  
82  
83  
84  
85  
86  
87  
88  
89  
90  
91  
92  
93  
94  
95  
96  
97  
98  
99  
100  
101  
102  
103  
104  
105  
106  
107  
108  
109  
110  
111  
112  
113  
114  
115  
116  
117  
118  
119  
120  
121  
122  
123  
124  
125  
126  
127  
128  
129  
130  
131  
132  
133  
134  
135  
136  
137  
138  
139  
140  
141  
142  
143  
144  
145  
146  
147  
148  
149  
150  
151  
152  
153  
154  
155  
156  
157  
158  
159  
160  
161  
162  
163  
164  
165  
166  
167  
168  
169  
170  
171  
172  
173  
174  
175  
176  
177  
178  
179  
180  
181  
182  
183  
184  
185  
186  
187  
188  
189  
190  
191  
192  
193  
194  
195  
196  
197  
198  
199  
200  
201  
202  
203  
204  
205  
206  
207  
208  
209  
210  
211  
212  
213  
214  
215  
216  
217  
218  
219  
220  
221  
222  
223  
224  
225  
226  
227  
228  
229  
230  
231  
232  
233  
234  
235  
236  
237  
238  
239  
240  
241  
242  
243  
244  
245  
246  
247  
248  
249  
250  
251  
252  
253  
254  
255  
256  
257  
258  
259  
260  
261  
262  
263  
264  
265  
266  
267  
268  
269  
270  
271  
272  
273  
274  
275  
276  
277  
278  
279  
280  
281  
282  
283  
284  
285  
286  
287  
288  
289  
290  
291  
292  
293  
294  
295  
296  
297  
298  
299  
300  
301  
302  
303  
304  
305  
306  
307  
308  
309  
310  
311  
312  
313  
314  
315  
316  
317  
318  
319  
320  
321  
322  
323  
324  
325  
326  
327  
328  
329  
330  
331  
332  
333  
334  
335  
336  
337  
338  
339  
340  
341  
342  
343  
344  
345  
346  
347  
348  
349  
350  
351  
352  
353  
354  
355  
356  
357  
358  
359  
360  
361  
362  
363  
364  
365  
366  
367  
368  
369  
370  
371  
372  
373  
374  
375  
376  
377  
378  
379  
380  
381  
382  
383  
384  
385  
386  
387  
388  
389  
390  
391  
392  
393  
394  
395  
396  
397  
398  
399  
400  
401  
402  
403  
404  
405  
406  
407  
408  
409  
410  
411  
412  
413  
414  
415  
416  
417  
418  
419  
420  
421  
422  
423  
424  
425  
426  
427  
428  
429  
430  
431  
432  
433  
434  
435  
436  
437  
438  
439  
440  
441  
442  
443  
444  
445  
446  
447  
448  
449  
450  
451  
452  
453  
454  
455  
456  
457  
458  
459  
460  
461  
462  
463  
464  
465  
466  
467  
468  
469  
470  
471  
472  
473  
474  
475  
476  
477  
478  
479  
480  
481  
482  
483  
484  
485  
486  
487  
488  
489  
490  
491  
492  
493  
494  
495  
496  
497  
498  
499  
500  
501  
502  
503  
504  
505  
506  
507  
508  
509  
510  
511  
512  
513  
514  
515  
516  
517  
518  
519  
520  
521  
522  
523  
524  
525  
526  
527  
528  
529  
530  
531  
532  
533  
534  
535  
536  
537  
538  
539  
540  
541  
542  
543  
544  
545  
546  
547  
548  
549  
550  
551  
552  
553  
554  
555  
556  
557  
558  
559  
560  
561  
562  
563  
564  
565  
566  
567  
568  
569  
570  
571  
572  
573  
574  
575  
576  
577  
578  
579  
580  
581  
582  
583  
584  
585  
586  
587  
588  
589  
590  
591  
592  
593  
594  
595  
596  
597  
598  
599  
600  
601  
602  
603  
604  
605  
606  
607  
608  
609  
610  
611  
612  
613  
614  
615  
616  
617  
618  
619  
620  
621  
622  
623  
624  
625  
626  
627  
628  
629  
630  
631  
632  
633  
634  
635  
636  
637  
638  
639  
640  
641  
642  
643  
644  
645  
646  
647  
648  
649  
650  
651  
652  
653  
654  
655  
656  
657  
658  
659  
660  
661  
662  
663  
664  
665  
666  
667  
668  
669  
670  
671  
672  
673  
674  
675  
676  
677  
678  
679  
680  
681  
682  
683  
684  
685  
686  
687  
688  
689  
690  
691  
692  
693  
694  
695  
696  
697  
698  
699  
700  
701  
702  
703  
704  
705  
706  
707  
708  
709  
710  
711  
712  
713  
714  
715  
716  
717  
718  
719  
720  
721  
722  
723  
724  
725  
726  
727  
728  
729  
730  
731  
732  
733  
734  
735  
736  
737  
738  
739  
740  
741  
742  
743  
744  
745  
746  
747  
748  
749  
750  
751  
752  
753  
754  
755  
756  
757  
758  
759  
760  
761  
762  
763  
764  
765  
766  
767  
768  
769  
770  
771  
772  
773  
774  
775  
776  
777  
778  
779  
780  
781  
782  
783  
784  
785  
786  
787  
788  
789  
790  
791  
792  
793  
794  
795  
796  
797  
798  
799  
800  
801  
802  
803  
804  
805  
806  
807  
808  
809  
810  
811  
812  
813  
814  
815  
816  
817  
818  
819  
820  
821  
822  
823  
824  
825  
826  
827  
828  
829  
830  
831  
832  
833  
834  
835  
836  
837  
838  
839  
840  
841  
842  
843  
844  
845  
846  
847  
848  
849  
850  
851  
852  
853  
854  
855  
856  
857  
858  
859  
860  
861  
862  
863  
864  
865  
866  
867  
868  
869  
870  
871  
872  
873  
874  
875  
876  
877  
878  
879  
880  
881  
882  
883  
884  
885  
886  
887  
888  
889  
890  
891  
892  
893  
894  
895  
896  
897  
898  
899  
900  
901  
902  
903  
904  
905  
906  
907  
908  
909  
910  
911  
912  
913  
914  
915  
916  
917  
918  
919  
920  
921  
922  
923  
924  
925  
926  
927  
928  
929  
930  
931  
932  
933  
934  
935  
936  
937  
938  
939  
940  
941  
942  
943  
944  
945  
946  
947  
948  
949  
950  
951  
952  
953  
954  
955  
956  
957  
958  
959  
960  
961  
962  
963  
964  
965  
966  
967  
968  
969  
970  
971  
972  
973  
974  
975  
976  
977  
978  
979  
980  
981  
982  
983  
984  
985  
986  
987  
988  
989  
990  
991  
992  
993  
994  
995  
996  
997  
998  
999  
1000

*Meaning of the study: possible explanations and implications for clinicians and policymakers*

1  
2  
3 This study demonstrates that women having laparoscopic excisional surgery for rectovaginal  
4 endometriosis obtain significant symptomatic relief, reduction in analgesia use and  
5 improvement in their quality of life. These improvements are present at six months and  
6 sustained at two years, with the exception of voiding difficulty. The lack of improvement in  
7 this symptom may be explained by the fact that the presence of bladder endometriosis was  
8 not an inclusion criterion for this study and so voiding complaints may be an independent  
9 symptom. This study cannot predict outcomes more than two years post-operatively but it  
10 is very encouraging that the worsening of symptom scores, analgesia use and quality of life  
11 scores post-operatively (from six months to two years) is extremely small compared to the  
12 large clinical improvement seen initially.  
13  
14  
15  
16  
17  
18  
19  
20  
21

22  
23 Rectovaginal endometriosis sits between the vagina and the rectum and thus the most  
24 consistent symptom differentiating it from the pain associated with less severe and other  
25 forms of endometriosis or adenomyosis, is pain on intercourse or 'dyspareunia'. In addition,  
26 in the more severe groups, pain on defaecation is a common symptom due to the proximity  
27 to, or invasion of, the bowel. Thus it is reassuring that the surgery resulted in a significant  
28 improvement in these symptoms and that the effect lasted for the two years of follow up.  
29 One of the side effects of all surgery is scarring and it is possible that a rectovaginal nodule  
30 of endometriosis excised may be replaced by scar tissue leading to a resumption of  
31 dyspareunia. These data would suggest that this was not the case. In addition the long term  
32 effects of surgery would suggest a lack of significant recurrence during the time scale of the  
33 study.  
34  
35  
36  
37  
38  
39  
40  
41  
42  
43  
44

45  
46 Laparoscopic surgical excision of rectovaginal endometriosis appears to be effective in  
47 treating chronic pelvic pain, bowel and urinary symptoms and improving health related  
48 quality of life and has an acceptable major complication rate when performed in specialist  
49 surgical centres. Women with severe and refractory symptoms adversely impacting on their  
50 quality of life should be offered laparoscopic surgical treatment in recognised endometriosis  
51 centres, where clinical outcomes are objectively audited. Commissioners of health services  
52  
53  
54  
55  
56  
57  
58  
59  
60

1  
2  
3 should restrict these highly complex surgical treatments to specialist centres to ensure an  
4 adequate case-load and where expertise is demonstrated through provision of auditable  
5 clinical outcomes.  
6  
7

#### 8 9 *Unanswered questions and future research*

10  
11  
12 Future studies should collect relevant baseline clinical data including comprehensive  
13 population characteristics, indications for surgery and fertility desires. Serial, standardised  
14 short and long term follow up will enhance comparability of data and a better evaluation of  
15 the longer term effects of laparoscopic interventions for deep rectovaginal disease on  
16 symptoms. Relevant and valid outcomes should be chosen with the help of patient  
17 involvement and should include valid collection of health related quality of life data. Such  
18 studies should be controlled, where possible and ideally randomised to reduce selection  
19 bias. A randomised controlled trial (RCT) comparing excisional surgery and diagnostic  
20 laparoscopy with the same number of ports is difficult ethically because women in the  
21 placebo arm would have been referred for specialist treatment and thus would be  
22 undergoing an unnecessary surgical intervention. Future studies should consider  
23 randomising between laparoscopic surgery and non-surgical therapy or alternatively  
24 compare different laparoscopic surgical interventions. The morbidity associated with  
25 rectovaginal endometriosis has a substantial economic impact due to the related reduction in  
26 activity both socially and in the work place. Thus, any future studies should include formal  
27 economic analysis to weigh the costs of surgical management against clinical, health service  
28 and societal gains.  
29  
30  
31  
32  
33  
34  
35  
36  
37  
38  
39  
40  
41  
42  
43  
44  
45  
46  
47  
48

#### 49 **Conclusions**

50  
51 This study presents by far the largest, multi-centre rectovaginal endometriosis surgical  
52 series in the literature both in relation to clinical outcomes and complication rates . Deep  
53 endometriosis is associated with a high disease burden and limited access to effective  
54  
55  
56  
57  
58  
59  
60

1  
2  
3 medical and surgical treatment is a large unmet need. Indeed, half our study population had  
4 undergone previous surgery for endometriosis mostly in non-specialist centres. Women  
5 suffer with chronic pain and psychological symptoms which impairs their quality of life.  
6  
7 Health services and the wider economy suffer through utilisation of substantial health care  
8  
9 resources and restrictions placed upon women's physical functioning which can lead to  
10  
11 absenteeism and the inability to fulfil domestic and professional duties.<sup>22</sup> The impact of  
12  
13 endometriosis on quality of life is well recognised<sup>20,23-25</sup> and well demonstrated in the  
14  
15 current study where the median pre-operative EQ global VAS score was only 55/100. It is  
16  
17 also widely acknowledged that surgical management of deep endometriosis involving the  
18  
19 rectovaginal septum and/or bowel is technically challenging and can be associated with high  
20  
21 rates of serious complications. However, women with deep endometriosis often have severe  
22  
23 and refractory symptoms adversely impacting on their quality of life<sup>6-8</sup> justifying the need for  
24  
25 effective surgical treatment even if associated with potentially serious complications.  
26  
27

28  
29 Our large, multicentre dataset demonstrates significant improvements in a variety of pain  
30  
31 and functional bowel symptoms from laparoscopic excisional surgery. The substantial and  
32  
33 sustained improvements in pain symptoms and health related quality of life and reassuringly  
34  
35 low rates of major perioperative and post-operative complications supports this form of  
36  
37 surgical treatment when conducted in specialist endometriosis centres. Future studies  
38  
39 should include formal economic analyses to weigh the costs of surgical management against  
40  
41 clinical, health service and societal gains.  
42  
43  
44  
45  
46  
47  
48  
49  
50  
51  
52  
53  
54  
55  
56  
57  
58  
59  
60

### What is already known on this subject

- Deep rectovaginal endometriosis is common, causing serious morbidity from chronic pelvic pain, subfertility, sexual dysfunction, bowel and urinary dysfunction as well as utilising health care and wider societal resources.
- Laparoscopic surgical excision is increasingly used to treat severe rectovaginal endometriosis in the absence of safe and effective medical therapy, but it requires advanced surgical skills due to its complexity and potential for serious complications.
- There is no consensus on the effectiveness and risks of laparoscopic surgical excision of rectovaginal endometriosis because evidence from large, multi-centre series with clearly defined populations are lacking.

### What this paper adds

- Laparoscopic surgical excision of rectovaginal endometriosis appears to be effective in treating chronic pelvic pain, sexual dysfunction, bowel and urinary symptoms and improving health related quality of life and has a low major complication rate when performed in specialist surgical centres.
- Women with severe and refractory symptoms adversely impacting on their quality of life should be offered laparoscopic surgical treatment in recognised endometriosis centres where clinical outcomes are audited.
- Future studies should randomise between laparoscopic surgery and non-surgical therapy incorporating health economic analyses and compare different laparoscopic surgical interventions for treating rectovaginal endometriosis.

**Copyright statement**

The Corresponding Author has the right to grant on behalf of all authors and does grant on behalf of all authors, a worldwide licence to the Publishers and its licensees in perpetuity, in all forms, formats and media (whether known now or created in the future), to i) publish, reproduce, distribute, display and store the Contribution, ii) translate the Contribution into other languages, create adaptations, reprints, include within collections and create summaries, extracts and/or, abstracts of the Contribution, iii) create any other derivative work(s) based on the Contribution, iv) to exploit all subsidiary rights in the Contribution, v) the inclusion of electronic links from the Contribution to third party material where-ever it may be located; and, vi) licence any third party to do any or all of the above.

**Competing interests:**

All authors have completed the ICMJE uniform disclosure form at [www.icmje.org/coi\\_disclosure.pdf](http://www.icmje.org/coi_disclosure.pdf) and declare: support from the British Society for Gynaecological Endoscopy (BSGE) for the submitted work; no financial relationships with any organisations that might have an interest in the submitted work in the previous three years; no other relationships or activities that could appear to have influenced the submitted work. All authors with the exception of TC are members of the BSGE.

**Contributorship statement**

The contributorship of the authors is as follows: Mr Dominic Byrne maintained and upgraded the endometriosis database, designed the study and analysis, provided data, contributed to data interpretation and drafting of the manuscript. Dr Tamara Curnow - conducted the statistical analysis, data interpretation and contributed to drafting of the manuscript. Mr Paul Smith



1  
2  
3 designed the study, conducted literature and reference review and contributed to drafting of  
4 the manuscript. Mr Ertan Saridogan – provided data, contributed to data interpretation and  
5 drafting of the manuscript. Mr Alfred Cutner – Responsible for set up of the BSGE endometriosis  
6 centres project, provided data, contributed to data interpretation and drafting of the  
7 manuscript. Professor T. Justin Clark – chaired the BSGE Endometriosis Centres Scientific  
8 Advisory Group, designed the study, contributed to data interpretation and drafting of the  
9 manuscript and is the Guarantor on behalf of the BSGE Endometriosis centres research group  
10  
11  
12  
13  
14  
15  
16  
17  
18  
19  
20  
21

#### 22 **Ethics:**

23 All patients gave written consent to have their data stored on the BSGE database and for its  
24 subsequent use in scientific research and publication. Written consent was obtained each time  
25 symptoms and quality of life data were collected. The database is managed in accordance with  
26 the data protection act, data are encrypted and the database is hosted by a third party that is  
27 paid by the BSGE for this service. The BSGE designed and developed the database. The BSGE is  
28 a charity which raises funds from its membership and scientific meeting sponsorship. All  
29 hospitals where clinicians enter data are informed in writing by the BSGE to the CEO and  
30 Medical Director about the patient data storage on the BSGE endometriosis database to ensure  
31 their agreement. Two authors were funded to carry out initial research (PS) and to perform  
32 statistical analysis on the data (TC).  
33  
34  
35  
36  
37  
38  
39  
40  
41  
42  
43  
44  
45  
46  
47  
48  
49

#### 50 **STROBE checklist:**

51 The checklist has been attached and uploaded as a supplemental file to the submitted paper.  
52  
53 We have paid particular attention to items which ask authors to "explain the scientific  
54  
55  
56  
57  
58  
59  
60

1  
2  
3 background and rationale for the investigation being reported" and "state specific objectives,  
4  
5 including any prespecified hypotheses."  
6  
7  
8  
9

#### 10 **Study funding:**

11 The BSGE is a registered charity and paid for the development and maintenance of the  
12 Endometriosis database. The BSGE provided limited funding for one author to perform  
13 background research and literature review (PS) and one author (TC) to undertake statistical  
14 analysis  
15  
16  
17  
18  
19  
20  
21  
22

#### 23 **Study sponsor / funder role:**

24 Each hospital that contributed data acted as a study sponsor in that they agreed to collection of  
25 data from their respective endometriosis centre and it being stored on the BSGE endometriosis  
26 database for research.  
27  
28  
29  
30  
31  
32

#### 33 **Statement of the independence of researchers from funders:**

34 There was no direct research funding apart from the BSGE financial support to set up and  
35 administer the database, employ a statistician and a research fellow  
36  
37  
38  
39  
40  
41  
42

#### 43 **Authors statement:**

44 We confirm that all authors had full access to all of the data (including statistical reports and  
45 tables) in the study and can take responsibility for the integrity of the data and the accuracy of  
46 the data analysis.  
47  
48  
49  
50  
51  
52  
53

#### 54 **Transparency declaration:**

1  
2  
3 I, T Justin Clark, on behalf of all other named authors affirms that the manuscript is an honest,  
4 accurate, and transparent account of the study being reported; that no important aspects of the  
5 study have been omitted; and that any discrepancies from the study as planned have been  
6 explained.  
7  
8  
9

10  
11  
12  
13  
14 **Data sharing statement:**

15  
16 The full dataset is available from the corresponding author at t.j.clark@doctors.org.uk  
17  
18  
19

20  
21 **Study registration number and name of register for any study type:**

22  
23 Not registered. The BSGE website describes the endometriosis centres project and the  
24 establishment of the endometriosis patient registry (endometriosis database) which meets the  
25 standards set by NICE for such records.  
26  
27  
28  
29  
30  
31  
32  
33  
34  
35  
36  
37  
38  
39  
40  
41  
42  
43  
44  
45  
46  
47  
48  
49  
50  
51  
52  
53  
54  
55  
56  
57  
58  
59  
60

## Aknowledgements

We are grateful to Jeremy Wright and Adam Moors who designed and established the BSGE endometriosis database and Dominic Byrne who upgraded it to increase completeness of data collection and follow up.

We are grateful to the BSGE Scientific Advisory Group who approve research on BSGE endometriosis database data and have scrutinised the manuscript. The members are: Prof Justin Clark (chair), Dominic Byrne, Oliver Chappatte, Alfred Cutner, Chris Guyer, Ertan Saridogan and Robert Richardson.

We would like to thank and acknowledge all the BSGE Endocentre teams for contributing to this work by entering their data on the BSGE Endometriosis database, they are listed alphabetically below with number of cases in brackets and name of lead Gynaecologist. The seven centres referred to in the paper with best follow up are marked in bold.

Aberdeen (99) Lucky Saraswat, **ACEMIG (140) Shaheen Khazali**, Altnergavin (36) Iris Menninger, Birmingham (58) Yousri Afifi, Castle Hill (103) Kevin Phillips, CEMIG (199) Saikat Banerjee, Chelsea and Westminster (258) Robert Richardson, Chester (88) Jeremy Hawe, Colchester (81) Barry Whitlow, **Cornwall (257) Dominic Byrne**, Croydon University hospital (57) Emmanuel Ofuasia Dewsbury/Elland (121) Ashwini Trehan, Dorset (57) Tyrone Carpenter, Endometriosis CaRe Oxford (164) Christian Becker, Exeter (23) James Clark, Expet Edinburch (52) Stuart Jack, **Guy's and Thomas' (29) Kumar Kunde** Gynaecology.co (98) Alfred Cutner, Homerton (21) Chris Barnick, Imperial (75) Alan Farthing, James Cook Hospital (111) Graham Phillips, Kings College (132) John Bidmead, Lancashire women's and newborn (31) Mohamed Abdel-Aty, Liverpool women's (85) George Botros, Luton and Dunstable (35) Marlin Mubarak, , Mid Yorks (46) Christian Kremer, Norfolk and Norwich University Hospital (53) Edward Morris, North Middlesex (34) Stanley Okolo, **North west pelvic pain, Manchester (87) Edmond Edi-Osagi**, Northwick Park Hospital (81) Kamel Shehata-Iskander, Penine (63) Gaity Ahmad, Plymouth (53) Jonathan Frappell, **Preston Royal, Lancashire (31)**

1  
2  
3 **Brice Rodriguez**, , Queens University Hospital, Romford (27) Yemi Coker, Royal London (55) Elizabeth  
4 Ball, Royal Stoke (69) Gourab Misra, Southampton (160) Adam Moors, , Southmead(104) Sanjay  
5 Vyas, St Georges (46) Thomas Ind, St Mary's, Portsmouth (143) Chris Guyer, **St Michaels Hospital,**  
6  
7 **Bristol (81) Caroline Overton**, Stockport (60) Suku George, The northern endometriosis team (49)  
8  
9 Tony Chalhoub, Tunbridge Wells (146) Oliver Chappatte, University College London Hospital (302)  
10  
11 Ertan Saridogan, University Hospital of Wales (80) Richard Penketh, UPMC Beacon (32) Moiad  
12  
13 Alazzam, Whipps Cross Hospital (82) Funlayo Odejinmi, Winchester (21) Keith Louden, Wirral  
14  
15 University Teaching Hospital (324) David Rowlands, **Worcestershire (82) Jon Hughes.**  
16  
17  
18  
19  
20  
21  
22  
23  
24  
25  
26  
27  
28  
29  
30  
31  
32  
33  
34  
35  
36  
37  
38  
39  
40  
41  
42  
43  
44  
45  
46  
47  
48  
49  
50  
51  
52  
53  
54  
55  
56  
57  
58  
59  
60

## References

1. Dunselman G a. J, Vermeulen N, Becker C, Calhaz-Jorge C, Hooghe T D', De Bie B, et al. ESHRE guideline: management of women with endometriosis. *Hum Reprod Oxf Engl*. 2014 Mar;29(3):400–12.
2. Koninckx PR, Martin DC. Deep endometriosis: a consequence of infiltration or retraction or possibly adenomyosis externa? *Fertil Steril*. 1992 Nov;58(5):924–8.
3. Vercellini P, Crosignani PG, Somigliana E, Berlanda N, Barbara G, Fedele L. Medical treatment for rectovaginal endometriosis: what is the evidence? *Hum Reprod Oxf Engl*. 2009 Oct;24(10):2504–14.
4. Fedele L, Bianchi S, Zanconato G, Tozzi L, Raffaelli R. Gonadotropin-releasing hormone agonist treatment for endometriosis of the rectovaginal septum. *Am J Obstet Gynecol*. 2000 Dec;183(6):1462–7.
5. Busacca M, Somigliana E, Bianchi S, De Marinis S, Calia C, Candiani M, et al. Post-operative GnRH analogue treatment after conservative surgery for symptomatic endometriosis stage III-IV: a randomized controlled trial. *Hum Reprod Oxf Engl*. 2001 Nov;16(11):2399–402.
6. Jerby BL, Kessler H, Falcone T, Milsom JW. Laparoscopic management of colorectal endometriosis. *Surg Endosc*. 1999 Nov;13(11):1125–8.
7. Redwine DB. Laparoscopic en bloc resection for treatment of the obliterated cul-de-sac in endometriosis. *J Reprod Med*. 1992 Aug;37(8):695–8.
8. Emmanuel KR, Davis C. Outcomes and treatment options in rectovaginal endometriosis. *Curr Opin Obstet Gynecol*. 2005 Aug;17(4):399–402.
9. De Cicco C, Corona R, Schonman R, Mailova K, Ussia A, Koninckx P. Bowel resection for deep endometriosis: a systematic review. *BJOG Int J Obstet Gynaecol*. 2011 Feb;118(3):285–91.
10. Meuleman C, Tomassetti C, Hoore A D', Van Cleynenbreugel B, Penninckx F, Vergote I, et al. Surgical treatment of deeply infiltrating endometriosis with colorectal involvement. *Hum Reprod Update*. 2011 Jun;17(3):311–26.
11. Kent A, Shakir F, Rockall T, Haines P, Pearson C, Rae-Mitchell W, et al. Laparoscopic Surgery for Severe Rectovaginal Endometriosis Compromising the Bowel: A Prospective Cohort Study. *J Minim Invasive Gynecol*. 2016 Jun;23(4):526–34.

12. Saridogan E, Byrne D. The British society for gynaecological endoscopy endometriosis centres project. *Gynecol Obstet Invest*. 2013;76(1):10–3.
13. Adamson GD. The modern role of reproductive surgery. *Clin Obstet Gynecol*. 2011;54(4):710–9.
14. Adamson GD, Pasta DJ. Endometriosis fertility index: the new, validated endometriosis staging system. *Fertil Steril*. 2010 Oct;94(5):1609–15.
15. Tuttlies F, Keckstein J, Ulrich U, Possover M, Schweppe KW, Wustlich M, et al. [ENZIAN-score, a classification of deep infiltrating endometriosis]. *Zentralbl Gynakol*. 2005 Oct;127(5):275–81.
16. Revised American Society for Reproductive Medicine classification of endometriosis: 1996. *Fertil Steril*. 1997 May;67(5):817–21.
17. EuroQol Group. EuroQol--a new facility for the measurement of health-related quality of life. *Health Policy Amst Neth*. 1990 Dec;16(3):199–208.
18. Rabin R, de Charro F. EQ-5D: a measure of health status from the EuroQol Group. *Ann Med*. 2001 Jul;33(5):337–43.
19. Setälä M, Härkki P, Matomäki J, Mäkinen J, Kössi J. Sexual functioning, quality of life and pelvic pain 12 months after endometriosis surgery including vaginal resection. *Acta Obstet Gynecol Scand*. 2012 Jun;91(6):692–8.
20. Garry R, Clayton R, Hawe J. The effect of endometriosis and its radical laparoscopic excision on quality of life indicators. *BJOG Int J Obstet Gynaecol*. 2000 Jan;107(1):44–54.
21. Mabrouk M, Montanari G, Guerrini M, Villa G, Solfrini S, Vicenzi C, et al. Does laparoscopic management of deep infiltrating endometriosis improve quality of life? A prospective study. *Health Qual Life Outcomes*. 2011;9:98.
22. Soliman AM, Yang H, Du EX, Kelley C, Winkel C. The direct and indirect costs associated with endometriosis: a systematic literature review. *Hum Reprod Oxf Engl*. 2016 Apr;31(4):712–22.
23. Dubernard G, Piketty M, Rouzier R, Houry S, Bazot M, Darai E. Quality of life after laparoscopic colorectal resection for endometriosis. *Hum Reprod Oxf Engl*. 2006 May;21(5):1243–7.

- 1
  - 2
  - 3
  - 4
  - 5
  - 6
  - 7
  - 8
  - 9
  - 10
  - 11
  - 12
  - 13
  - 14
  - 15
  - 16
  - 17
  - 18
  - 19
  - 20
  - 21
  - 22
  - 23
  - 24
  - 25
  - 26
  - 27
  - 28
  - 29
  - 30
  - 31
  - 32
  - 33
  - 34
  - 35
  - 36
  - 37
  - 38
  - 39
  - 40
  - 41
  - 42
  - 43
  - 44
  - 45
  - 46
  - 47
  - 48
  - 49
  - 50
  - 51
  - 52
  - 53
  - 54
  - 55
  - 56
  - 57
  - 58
  - 59
  - 60
24. Redwine DB, Wright JT. Laparoscopic treatment of complete obliteration of the cul-de-sac associated with endometriosis: long-term follow-up of en bloc resection. *Fertil Steril*. 2001 Aug;76(2):358–65.
25. Dubernard G, Rouzier R, David-Montefiore E, Bazot M, Darai E. Use of the SF-36 questionnaire to predict quality-of-life improvement after laparoscopic colorectal resection for endometriosis. *Hum Reprod Oxf Engl*. 2008 Apr;23(4):846–51.

For peer review only



1  
2  
3  
4  
5  
6  
7  
8  
9  
10  
11  
12  
13  
14  
15  
16  
17  
18  
19  
20  
21  
22  
23  
24  
25  
26  
27  
28  
29  
30  
31  
32  
33  
34  
35  
36  
37  
38  
39  
40  
41  
42  
43  
44  
45  
46  
47

**Table 1.** Patient reported symptoms prior to laparoscopic surgical excision of rectovaginal endometriosis and at six months, one year and two years post treatment (median scores are presented (0-10 for the first nine symptoms and 0-4 for the remaining 5 symptoms) with total number of patients in brackets).

| Pre menstrual pain                 | Pre-surgery | 6 months   | 12 months  | 24 months | Short – term <sup>1</sup><br>(baseline vs. 6 months) | Long – term <sup>1</sup><br>(baseline vs. 24 months) | Change <sup>2</sup><br>(6 months vs. 24 months) |
|------------------------------------|-------------|------------|------------|-----------|------------------------------------------------------|------------------------------------------------------|-------------------------------------------------|
| Premenstrual pain                  | 7.0 (4035)  | 3.0 (1908) | 3.0 (1177) | 3.0 (558) | 0.000v (1874)                                        | 0.000v (554)                                         | 0.000^ (380)                                    |
| Menstrual pain                     | 9.0 (4039)  | 4.0 (1899) | 4.0 (1171) | 5.0 (551) | 0.000v (1869)                                        | 0.000v (549)                                         | 0.005^ (375)                                    |
| Non cyclical pelvic pain           | 6.0 (4154)  | 2.0 (2170) | 2.0 (1360) | 3.0 (658) | 0.000v (2160)                                        | 0.000v (656)                                         | 0.000^ (453)                                    |
| Deep dyspareunia                   | 5.5 (3986)  | 1.0 (1998) | 1.0 (1247) | 2.0 (608) | 0.000v (1952)                                        | 0.000v (598)                                         | 0.000^ (403)                                    |
| Cyclical dyschezia                 | 6.0 (4040)  | 0.0 (1937) | 1.0 (1219) | 2.0 (569) | 0.000v (1900)                                        | 0.000v (568)                                         | 0.000^ (384)                                    |
| Non cyclical dyschezia             | 3.0 (4135)  | 0.0 (2178) | 0.0 (1374) | 0.0 (655) | 0.000v (2162)                                        | 0.000v (646)                                         | 0.000^ (449)                                    |
| Lower back pain                    | 6.0 (4150)  | 3.0 (2188) | 3.0 (1376) | 3.0 (660) | 0.000v (2172)                                        | 0.000v (656)                                         | 0.027^ (457)                                    |
| Bladder pain or pain passing urine | 0.0 (4084)  | 0.0 (2162) | 0.0 (1369) | 0.0 (652) | 0.000v (2122)                                        | 0.000v (638)                                         | 0.034^ (446)                                    |
| Difficulty emptying bladder        | 0.0 (4002)  | 0.0 (2135) | 0.0 (1360) | 0.0 (650) | 0.000v (2075)                                        | 0.105 (628)                                          | 0.002^ (440)                                    |
| Frequent bowel movements           | 2.0 (3995)  | 2.0 (2154) | 2.0 (1372) | 2.0 (660) | 0.000v (2087)                                        | 0.012v (626)                                         | 0.051 (451)                                     |
| Urgent bowel movements             | 1.0 (3996)  | 1.0 (2154) | 1.0 (1371) | 1.0 (658) | 0.000v (2091)                                        | 0.006v (623)                                         | 0.000^ (449)                                    |
| Incomplete emptying sensation      | 1.0 (3980)  | 1.0 (2149) | 1.0 (1372) | 1.0 (659) | 0.000v (2075)                                        | 0.000v (623)                                         | 0.004^ (447)                                    |
| Constipation                       | 2.0 (4000)  | 1.0 (2156) | 1.0 (1368) | 1.0 (658) | 0.000v (2091)                                        | 0.002v (628)                                         | 0.001^ (449)                                    |
| Blood in the stool                 | 0.0 (3893)  | 0.0 (1912) | 0.0 (1206) | 0.0 (546) | 0.000v (1831)                                        | 0.038v (507)                                         | 0.001^ (350)                                    |

Lower score denotes less severe symptoms. Denominator (responses) shown in parentheses

<sup>1</sup> Statistical comparison (Mann Whitney U test) of short term symptom scores (6 months post surgery) and long term symptom scores (2 years post surgery) with baseline scores (pre-surgery)

<sup>2</sup> Statistical comparison (Mann Whitney U test) of change in symptom scores over time post treatment (between 6 months and 2 years)

^ = statistically significant increase, v = statistically significant decrease.

Note that there is some variation in total number of responses depending on whether patients chose not to answer some questions

**Table 2.** Median scores for patient reported quality of life prior to treatment and at six months, one year and two years post treatment with total number of patients in brackets. Median EQVAS lies in the range 0-100 with a higher score associated with a better quality of life. The other median scores (EQ5D) lie in the range 0-2 where a lower score is associated with a better quality of life.

| Pre menstrual pain         | Pre-surgery | 6 months    | 12 months   | 24 months  | Short – term <sup>2</sup><br>(baseline vs. 6 months) | Long – term <sup>2</sup><br>(baseline vs. 24 months) | Change <sup>3</sup><br>(6 months vs. 24 months) |
|----------------------------|-------------|-------------|-------------|------------|------------------------------------------------------|------------------------------------------------------|-------------------------------------------------|
| EQVAS numeric <sup>1</sup> | 55.0 (4014) | 80.0 (2050) | 80.0 (1247) | 76.0 (575) | 0.000 <sup>^</sup> (2045)                            | 0.000 <sup>^</sup> (573)                             | 0.024 <sup>v</sup> (396)                        |
| EQ5D Usual Activities      | 1.0 (4004)  | 0.0 (2051)  | 0.0 (1250)  | 0.0 (574)  | 0.000 <sup>v</sup> (2042)                            | 0.000 <sup>v</sup> (570)                             | 0.477 (395)                                     |
| EQ5D Pain discomfort       | 1.0 (4003)  | 1.0 (2050)  | 1.0 (1252)  | 1.0 (573)  | 0.000 <sup>v</sup> (2041)                            | 0.000 <sup>v</sup> (569)                             | 0.427 (394)                                     |
| EQ5D Anxiety depression    | 1.0 (3990)  | 0.0 (2049)  | 0.0 (1252)  | 0.0 (573)  | 0.000 <sup>v</sup> (2033)                            | 0.000 <sup>v</sup> (569)                             | 0.331 (395)                                     |
| EQ5D Mobility              | 0.0 (3998)  | 0.0 (2046)  | 0.0 (1250)  | 0.0 (569)  | 0.000 <sup>v</sup> (2035)                            | 0.000 <sup>v</sup> (563)                             | 0.339 (392)                                     |
| EQ5D SelfCare              | 0.0 (3993)  | 0.0 (2033)  | 0.0 (1248)  | 0.0 (558)  | 0.000 <sup>v</sup> (2020)                            | 0.001 <sup>v</sup> (548)                             | 0.364 (384)                                     |

Denominator (responses) shown in parentheses

<sup>1</sup>A high Euroqol Visual Analogue Scale (EQ-VAS) score is associated with an improvement in QoL whereas with all other QoL and symptom scores a low value is associated with improvement.

<sup>2</sup>Statistical comparison (Mann Whitney U test ) of short term symptom scores (6 months post surgery) and long term symptom scores (2 years post surgery) with baseline scores (pre-surgery)

<sup>3</sup>Statistical comparison (Mann Whitney U test ) of change in symptom scores over time post treatment (between 6 months and 2 years)

<sup>^</sup> = statistically significant increase, <sup>v</sup> = statistically significant decrease.

Note that there is some variation in total number of responses depending on whether patients chose not to answer some questions.

1  
2  
3  
4  
5  
6  
7  
8  
9  
10  
11  
12  
13  
14  
15  
16  
17  
18  
19  
20  
21  
22  
23  
24  
25  
26  
27  
28  
29  
30  
31  
32  
33  
34  
35  
36  
37  
38  
39  
40  
41  
42  
43  
44  
45  
46  
47

**Table 3.** Analgesia use prior to surgery and at six months, one year and two years post surgery. Percentage of patients using medication with total number of patients in brackets.

| <b>Pre menstrual pain</b> | <b>Pre-surgery</b> | <b>6 months</b> | <b>12 months</b> | <b>24 months</b> | <b>Short – term<sup>1</sup><br/>(baseline vs. 6 months)</b> | <b>Long – term<sup>1</sup><br/>(baseline vs. 24 months)</b> | <b>Change<sup>2</sup><br/>(6 months vs. 24 months)</b> |
|---------------------------|--------------------|-----------------|------------------|------------------|-------------------------------------------------------------|-------------------------------------------------------------|--------------------------------------------------------|
| Paracetamol               | 76.0% (4118)       | 59.8%(1934)     | 60.6% (1235)     | 61.4% (610)      | 0.000v (1915)                                               | 0.000v (604)                                                | 0.001^ (388)                                           |
| NSAID                     | 69.8% (4099)       | 48.9%(1924)     | 48.3% (1229)     | 52.0% (603)      | 0.000v (1903)                                               | 0.000v (593)                                                | 0.013^ (385)                                           |
| Opiates                   | 28.1% (3953)       | 16.1% (1895)    | 16.8% (1214)     | 16.6% (592)      | 0.000v (1859)                                               | 0.000v (575)                                                | 0.006^ (376)                                           |

Denominator (responses) shown in parentheses

NSAID – non-steroidal anti-inflammatory drug

<sup>1</sup> Statistical comparisons of short term symptom scores (6 months post surgery) and long term symptom scores (2 years post surgery) with baseline scores (pre-surgery) assessed using a 2-tailed sign test.

<sup>2</sup> Statistical comparison of change in symptom scores over time post treatment (between 6 months and 2 years) using a 2-tailed sign-test.

^ = statistically significant increase, v = statistically significant decrease.

Note that there is some variation in total number of responses depending on whether patients chose not to answer some questions

**Table 4.** Sensitivity analysis for missing post-operative data.

|                                         | Short-term<br>(6 months) <sup>1</sup> | Long-term<br>(2 years) <sup>1</sup> | Range    |
|-----------------------------------------|---------------------------------------|-------------------------------------|----------|
| <i>Symptoms</i>                         |                                       |                                     |          |
| Premenstrual pain                       | 9                                     | 8                                   | [0, 10]  |
| Menstrual pain                          | 10                                    | 10                                  | [0, 10]  |
| Non cyclical pelvic pain                | 7                                     | 6                                   | [0, 10]  |
| Deep dyspareunia                        | 8                                     | 6                                   | [0, 10]  |
| Cyclical dyschezia                      | 7                                     | 7                                   | [0, 10]  |
| Non cyclical dyschezia                  | 5                                     | 3                                   | [0, 10]  |
| Low back pain                           | 7                                     | 7                                   | [0, 10]  |
| Bladder pain                            | 2                                     | 1                                   | [0, 10]  |
| Voiding difficulty                      | 0                                     | NS                                  | [0, 10]  |
| Frequent bowel movements <sup>2</sup>   | 3                                     | 3                                   | [0, 4]   |
| Urgent bowel movements <sup>2</sup>     | 2                                     | 2                                   | [0, 4]   |
| Incomplete bowel movements <sup>2</sup> | 2                                     | 2                                   | [0, 4]   |
| Constipation <sup>2</sup>               | 2                                     | 2                                   | [0, 4]   |
| Blood in the stool <sup>2</sup>         | 0                                     | 1                                   | [0, 4]   |
| <i>Quality of life<sup>2</sup></i>      |                                       |                                     |          |
| EQ Visual analogue score                | 40                                    | 55                                  | [0, 100] |
| EQ5D Usual Activities                   | 2                                     | 1                                   | [0, 2]   |
| EQ5D Pain and discomfort                | 2                                     | 2                                   | [0, 2]   |
| EQ5D Anxiety and depression             | 1                                     | 1                                   | [0, 2]   |
| EQ5D Mobility                           | 1                                     | 1                                   | [0, 2]   |
| EQ5D Self care                          | 1                                     | 1                                   | [0, 2]   |

<sup>1</sup> The worst possible score that could be reported for all the missing post-operative data in order for the short-term (six months) or long-term statistics in Tables 3 & 4 to still be significant (The test statistics that were not significant (NS) to start with have not been included).

<sup>2</sup> A high EuroQol Visual Analogue Scale (EQ-VAS) score is associated with an improvement in QoL whereas with all other QoL and symptom scores a low value is associated with improvement.

**Table 5.** Sensitivity analysis for missing post-operative data restricted to the seven British Society for Gynaecological Endoscopy (BSGE) Endometriosis Centres with the most complete follow-up.

|                                         | Short-term (6 months) <sup>1</sup> | Long-term (2 years) <sup>1</sup> | Range    |
|-----------------------------------------|------------------------------------|----------------------------------|----------|
| <i>Symptoms</i>                         |                                    |                                  |          |
| Premenstrual pain                       | 10                                 | 7                                | [0, 10]  |
| Menstrual pain                          | 10                                 | 9                                | [0, 10]  |
| Non cyclical pelvic pain                | 10                                 | 5                                | [0, 10]  |
| Deep dyspareunia                        | 10                                 | 5                                | [0, 10]  |
| Cyclical dyschezia                      | 10                                 | 5                                | [0, 10]  |
| Non cyclical dyschezia                  | 7                                  | 4                                | [0, 10]  |
| Low back pain                           | 10                                 | 5                                | [0, 10]  |
| Bladder pain                            | 4                                  | 1                                | [0, 10]  |
| Voiding difficulty                      | 1                                  | NS                               | [0, 10]  |
| Frequent bowel movements <sup>2</sup>   | 2                                  | NS                               | [0, 4]   |
| Urgent bowel movements <sup>2</sup>     | 3                                  | NS                               | [0, 4]   |
| Incomplete bowel movements <sup>2</sup> | 2                                  | NS                               | [0, 4]   |
| Constipation <sup>2</sup>               | 2                                  | NS                               | [0, 4]   |
| Blood in the stool <sup>2</sup>         | 2                                  | 1                                | [0, 4]   |
| <i>Quality of life<sup>2</sup></i>      |                                    |                                  |          |
| EQ Visual analogue score                | 0                                  | 55                               | [0, 100] |
| EQ5D Usual Activities                   | 1                                  | 1                                | [0, 2]   |
| EQ5D Pain and discomfort                | 2                                  | 2                                | [0, 2]   |
| EQ5D Anxiety and depression             | 2                                  | 1                                | [0, 2]   |
| EQ5D Mobility                           | 0                                  | 1                                | [0, 2]   |
| EQ5D Self care                          | 1                                  | NS                               | [0, 2]   |

<sup>1</sup> The worst possible score that could be reported for all the missing post-operative data in order for the short-term (six months) or long-term statistics in Tables 3 & 4 to still be significant (The test statistics that were not significant (NS) to start with have not been included).

<sup>2</sup> A high EuroQol Visual Analogue Scale (EQ-VAS) score is associated with an improvement in QoL whereas with all other QoL and symptom scores a low value is associated with improvement.

**Table 6.** Incidence of peri-operative and post-operative complications.

| Peri-operative complication                            | Number of patients | Incidence   |
|--------------------------------------------------------|--------------------|-------------|
| Haemorrhage >1litre                                    | 43                 | 0.9%        |
| Ureteric injury                                        | 24                 | 0.5%        |
| Unexpected bowel injury                                | 28                 | 0.6%        |
| Unexpected bladder injury                              | 17                 | 0.4%        |
| Unexpected vascular injury                             | 10                 | 0.2%        |
| Epigastric injury                                      | 4                  | 0.1%        |
| Conversion to laparotomy                               | 41                 | 0.9%        |
| Colostomy                                              | 9                  | 0.2%        |
| Ileostomy                                              | 14                 | 0.3%        |
| Unplanned Removal of any other organ                   | 11                 | 0.2%        |
| Death                                                  | 0                  | 0.0%        |
| <b>Total suffering any perioperative complication</b>  | <b>220</b>         | <b>4.7%</b> |
|                                                        |                    |             |
| <b>Post-operative complication</b>                     |                    |             |
|                                                        |                    |             |
| Pelvic haematoma                                       | 37                 | 0.8%        |
| Pelvic Abscess                                         | 17                 | 0.4%        |
| Urinary tract leak                                     | 11                 | 0.2%        |
| Bowel leak                                             | 17                 | 0.4%        |
| Urinary tract fistula                                  | 2                  | 0.0%        |
| Bowel fistula                                          | 12                 | 0.3%        |
| Severe sepsis                                          | 10                 | 0.2%        |
| Pulmonary embolism                                     | 1                  | 0.0%        |
| <b>Total suffering any post operative complication</b> | <b>120</b>         | <b>2.5%</b> |
|                                                        |                    |             |

Note that some patients suffered more than one complication

**Table 7.** Incidence of bowel complication related to the type of surgery performed on the bowel.

| Type of bowel surgery | Number of operations | UBI       | Leak      | Fistula   | Total     |
|-----------------------|----------------------|-----------|-----------|-----------|-----------|
| No Bowel Surgery      | 1740                 | 6 (0.3%)  | 3 (0.2%)  | 2 (0.1%)  | 11 (0.6%) |
| Shaved                | 2746                 | 18 (0.7%) | 6 (0.2%)  | 5 (0.2%)  | 29 (1.1%) |
| Disc Resection        | 54                   | 0 (0.0%)  | 4 (7.4%)  | 3 (5.6%)  | 5 (9.3%)  |
| Segmental Resection   | 181                  | 4 (2.2%)  | 4 (2.2%)  | 2 (1.1%)  | 7 (3.9%)  |
| Total                 | 4721                 | 28 (0.6%) | 17 (0.4%) | 12 (0.3%) | 52 (1.1%) |

*UBI = unexpected bowel injury at the time of surgery. Leak = any bowel leak identified after primary surgery. Fistula formation is a late complication from surgery.*

**Supplementary table 1.** Patient reported symptoms prior to laparoscopic surgical excision of rectovaginal endometriosis and at six months, one year and two years post treatment (median scores are presented (0-10 for the first nine symptoms and 0-4 for the remaining 5 symptoms) with total number of patients in brackets) restricted to the seven British Society for Gynaecological Endoscopy (BSGE) Endometriosis Centres with the most complete follow-up. A lower score is associated with less severe symptoms.

|                               | Pre-surgery | 6 months  | 12 months | 24 months | Short – term <sup>1</sup><br>(baseline vs. 6 months) | Long – term <sup>1</sup><br>(baseline vs. 24 months) | Change <sup>2</sup><br>(6 months vs. 24 months) |
|-------------------------------|-------------|-----------|-----------|-----------|------------------------------------------------------|------------------------------------------------------|-------------------------------------------------|
| Premenstrualpain              | 7.0 (648)   | 2.0 (447) | 3.0 (284) | 4.0 (122) | 0.000v (437)                                         | 0.000v (122)                                         | 0.108 (100)                                     |
| Menstrualpain                 | 9.0 (649)   | 4.0 (446) | 4.0 (284) | 6.0 (121) | 0.000v (437)                                         | 0.000v (121)                                         | 0.017^ (99)                                     |
| Noncyclicalpelvicpain         | 6.0 (676)   | 2.0 (517) | 2.0 (333) | 3.0 (152) | 0.000v (516)                                         | 0.000v (151)                                         | 0.007^ (125)                                    |
| Deepdyspareunia               | 6.0 (646)   | 1.0 (453) | 1.0 (303) | 2.0 (137) | 0.000v (449)                                         | 0.000v (136)                                         | 0.317 (105)                                     |
| Cyclicaldyschezia             | 6.0 (648)   | 0.0 (455) | 0.0 (295) | 3.0 (128) | 0.000v (444)                                         | 0.000v (128)                                         | 0.000^ (103)                                    |
| Noncyclicaldyschezia          | 3.0 (673)   | 0.0 (519) | 0.0 (339) | 0.0 (151) | 0.000v (516)                                         | 0.000v (149)                                         | 0.192 (123)                                     |
| Lowerbackpain                 | 6.0 (671)   | 2.0 (521) | 2.0 (341) | 4.0 (152) | 0.000v (515)                                         | 0.000v (151)                                         | 0.905 (126)                                     |
| Bladderpainorpainpassingurine | 0.0 (668)   | 0.0 (518) | 0.0 (337) | 0.0 (153) | 0.000v (511)                                         | 0.000v (151)                                         | 0.560 (126)                                     |
| Difficultyemptyingbladder     | 0.0 (662)   | 0.0 (516) | 0.0 (336) | 0.0 (153) | 0.000v (506)                                         | 0.136 (150)                                          | 0.558 (124)                                     |
| Frequentbowelmovements        | 2.0 (665)   | 2.0 (521) | 2.0 (340) | 2.0 (151) | 0.000v (513)                                         | 0.343 (146)                                          | 0.096 (125)                                     |
| Urgentbowelmovements          | 1.0 (665)   | 1.0 (521) | 1.0 (339) | 1.0 (150) | 0.000v (513)                                         | 0.524 (145)                                          | 0.000^ (124)                                    |
| Incompleteemptyingsensation   | 1.0 (662)   | 1.0 (519) | 1.0 (340) | 1.0 (153) | 0.000v (509)                                         | 0.426 (147)                                          | 0.001^ (126)                                    |
| Constipation                  | 1.0 (664)   | 1.0 (521) | 1.0 (340) | 1.0 (151) | 0.000v (512)                                         | 0.093 (146)                                          | 0.024^ (125)                                    |
| Bloodinthestool               | 0.0 (641)   | 0.0 (450) | 0.0 (294) | 0.0 (125) | 0.000v (439)                                         | 0.019v (118)                                         | 0.074 (98)                                      |

Denominator (responses) shown in parentheses

<sup>1</sup> Statistical comparison (Mann Whitney U test) of short term symptom scores (6 months post surgery) and long term symptom scores (2 years post surgery) with baseline scores (pre-surgery)

<sup>2</sup> Statistical comparison (Mann Whitney U test) of change in symptom scores over time post treatment (between 6 months and 2 years)

^ = statistically significant increase, v = statistically significant decrease.

Note that there is some variation in total number of responses depending on whether patients chose not to answer some question



**Supplementary table 2.** Median scores for patient reported quality of life prior to treatment and at six months, one year and two years post treatment with total number of patients in brackets restricted to the seven British Society for Gynaecological Endoscopy (BSGE) Endometriosis Centres with the most complete follow-up. Median EQVAS lies in the range 0-100 with a higher score associated with a better quality of life. The other median scores (EQ5D) lie in the range 0-2 where a lower score is associated with a better quality of life.

|                       | Pre-surgery | 6 months   | 12 months  | 24 months  | Short – term <sup>2</sup><br>(baseline vs. 6 months) | Long – term <sup>2</sup><br>(baseline vs. 24 months) | Change <sup>3</sup><br>(6 months vs. 24 months) |
|-----------------------|-------------|------------|------------|------------|------------------------------------------------------|------------------------------------------------------|-------------------------------------------------|
| EQUVASnumeric         | 55.0 (664)  | 80.0 (510) | 80.0 (328) | 75.0 (136) | 0.000 <sup>^</sup> (508)                             | 0.000 <sup>^</sup> (136)                             | 0.036 <sup>v</sup> (116)                        |
| EQ5DUusualActivities  | 1.0 (666)   | 0.0 (510)  | 0.0 (330)  | 0.0 (135)  | 0.000 <sup>v</sup> (510)                             | 0.000 <sup>v</sup> (135)                             | 0.140 (116)                                     |
| EQ5DPainDiscomfort    | 1.0 (667)   | 1.0 (510)  | 1.0 (332)  | 1.0 (135)  | 0.000 <sup>v</sup> (510)                             | 0.000 <sup>v</sup> (135)                             | 0.025 <sup>^</sup> (116)                        |
| EQ5DAnxietydepression | 1.0 (663)   | 0.0 (510)  | 0.0 (332)  | 0.0 (134)  | 0.000 <sup>v</sup> (507)                             | 0.000 <sup>v</sup> (134)                             | 0.490 (116)                                     |
| EQ5DMobility          | 0.0 (667)   | 0.0 (510)  | 0.0 (332)  | 0.0 (134)  | 0.000 <sup>v</sup> (510)                             | 0.000 <sup>v</sup> (134)                             | 0.034 <sup>^</sup> (116)                        |
| EQ5DSelfCare          | 0.0 (666)   | 0.0 (509)  | 0.0 (332)  | 0.0 (135)  | 0.000 <sup>v</sup> (508)                             | 0.134 (135)                                          | 0.453 (116)                                     |

Denominator (responses) shown in parentheses

<sup>1</sup>A high Euroqol Visual Analogue Scale (EQ-VAS) score is associated with an improvement in QoL whereas with all other QoL and symptom scores a low value is associated with improvement.

<sup>2</sup>Statistical comparison (Mann Whitney U test ) of short term symptom scores (6 months post surgery) and long term symptom scores (2 years post surgery) with baseline scores (pre-surgery)

<sup>3</sup>Statistical comparison (Mann Whitney U test ) of change in symptom scores over time post treatment (between 6 months and 2 years)

<sup>^</sup> = statistically significant increase, <sup>v</sup> = statistically significant decrease.

Note that there is some variation in total number of responses depending on whether patients chose not to answer some questions.

**Supplementary table 3.** Analgesia use prior to surgery and at six months, one year and two years post surgery restricted to the seven British Society for Gynaecological Endoscopy (BSGE) Endometriosis Centres with the most complete follow-up. Percentage of patients using medication with total number of patients in brackets.

|             | <b>Pre-surgery</b> | <b>6 months</b> | <b>12 months</b> | <b>24 months</b> | <b>Short – term<sup>1</sup><br/>(baseline vs. 6 months)</b> | <b>Long – term<sup>1</sup><br/>(baseline vs. 24 months)</b> | <b>Change<sup>2</sup><br/>(6 months vs. 24 months)</b> |
|-------------|--------------------|-----------------|------------------|------------------|-------------------------------------------------------------|-------------------------------------------------------------|--------------------------------------------------------|
| Paracetamol | 68.3% (672)        | 51.1% (464)     | 50.3% (302)      | 56.3% (144)      | 0.000v (461)                                                | 0.002v (142)                                                | 0.031^ (100)                                           |
| NSAID       | 74.0% (672)        | 48.0% (465)     | 47.0% (302)      | 59.0% (144)      | 0.000v (462)                                                | 0.053 (142)                                                 | 0.003^ (100)                                           |
| Opiates     | 27.2% (669)        | 16.6% (465)     | 16.9% (301)      | 25.7% (144)      | 0.000v (462)                                                | 0.418 (142)                                                 | 0.001^ (100)                                           |

Denominator (responses) shown in parentheses

NSAID – non-steroidal anti-inflammatory drug

<sup>1</sup> Statistical comparisons of short term symptom scores (6 months post surgery) and long term symptom scores (2 years post surgery) with baseline scores (pre-surgery) assessed using a 2-tailed sign test.

<sup>2</sup> Statistical comparison of change in symptom scores over time post treatment (between 6 months and 2 years) using a 2-tailed sign-test.

^ = statistically significant increase, v = statistically significant decrease.

Note that there is some variation in total number of responses depending on whether patients chose not to answer some questions

## STROBE Statement—checklist of items that should be included in reports of observational studies

|                              | Item No | Recommendation                                                                                                                                                                                                                                                                                                                                                                                                                                                                                                                                                                                                                                                                                                    |
|------------------------------|---------|-------------------------------------------------------------------------------------------------------------------------------------------------------------------------------------------------------------------------------------------------------------------------------------------------------------------------------------------------------------------------------------------------------------------------------------------------------------------------------------------------------------------------------------------------------------------------------------------------------------------------------------------------------------------------------------------------------------------|
| <b>Title and abstract</b>    | 1       | (a) Indicate the study's design with a commonly used term in the title or the abstract<br><b>Page 1</b><br>(b) Provide in the abstract an informative and balanced summary of what was done and what was found <b>Pages 2-3</b>                                                                                                                                                                                                                                                                                                                                                                                                                                                                                   |
| <b>Introduction</b>          |         |                                                                                                                                                                                                                                                                                                                                                                                                                                                                                                                                                                                                                                                                                                                   |
| Background/rationale         | 2       | Explain the scientific background and rationale for the investigation being reported<br><b>Pages 4-5</b>                                                                                                                                                                                                                                                                                                                                                                                                                                                                                                                                                                                                          |
| Objectives                   | 3       | State specific objectives, including any prespecified hypotheses <b>Page 5</b>                                                                                                                                                                                                                                                                                                                                                                                                                                                                                                                                                                                                                                    |
| <b>Methods</b>               |         |                                                                                                                                                                                                                                                                                                                                                                                                                                                                                                                                                                                                                                                                                                                   |
| Study design                 | 4       | Present key elements of study design early in the paper <b>Page 5</b>                                                                                                                                                                                                                                                                                                                                                                                                                                                                                                                                                                                                                                             |
| Setting                      | 5       | Describe the setting, locations, and relevant dates, including periods of recruitment, exposure, follow-up, and data collection <b>Page 5</b>                                                                                                                                                                                                                                                                                                                                                                                                                                                                                                                                                                     |
| Participants                 | 6       | (a) <i>Cohort study</i> —Give the eligibility criteria, and the sources and methods of selection of participants. Describe methods of follow-up <b>Pages 5-6</b><br><i>Case-control study</i> —Give the eligibility criteria, and the sources and methods of case ascertainment and control selection. Give the rationale for the choice of cases and controls<br><i>Cross-sectional study</i> —Give the eligibility criteria, and the sources and methods of selection of participants<br>(b) <i>Cohort study</i> —For matched studies, give matching criteria and number of exposed and unexposed<br><i>Case-control study</i> —For matched studies, give matching criteria and the number of controls per case |
| Variables                    | 7       | Clearly define all outcomes, exposures, predictors, potential confounders, and effect modifiers. Give diagnostic criteria, if applicable <b>Pages 6-8</b>                                                                                                                                                                                                                                                                                                                                                                                                                                                                                                                                                         |
| Data sources/<br>measurement | 8*      | For each variable of interest, give sources of data and details of methods of assessment (measurement). Describe comparability of assessment methods if there is more than one group <b>Pages 6-8</b>                                                                                                                                                                                                                                                                                                                                                                                                                                                                                                             |
| Bias                         | 9       | Describe any efforts to address potential sources of bias <b>Pages 8-9</b>                                                                                                                                                                                                                                                                                                                                                                                                                                                                                                                                                                                                                                        |
| Study size                   | 10      | Explain how the study size was arrived at <b>Not done – largest prospective cohort in the world by far – decision to analyse and publish once large number obtained - 5000; Not a trial so no formal sample size calculation</b>                                                                                                                                                                                                                                                                                                                                                                                                                                                                                  |
| Quantitative variables       | 11      | Explain how quantitative variables were handled in the analyses. If applicable, describe which groupings were chosen and why <b>Pages 6-8</b>                                                                                                                                                                                                                                                                                                                                                                                                                                                                                                                                                                     |
| Statistical methods          | 12      | (a) Describe all statistical methods, including those used to control for confounding <b>Pages 8-9</b><br>(b) Describe any methods used to examine subgroups and interactions <b>Pages 8-9</b><br>(c) Explain how missing data were addressed <b>Pages 8-9</b><br>(d) <i>Cohort study</i> —If applicable, explain how loss to follow-up was addressed <b>Pages 8-9</b><br><i>Case-control study</i> —If applicable, explain how matching of cases and controls was addressed<br><i>Cross-sectional study</i> —If applicable, describe analytical methods taking account of                                                                                                                                        |

1  
2  
3  
4  
5  
6  
7  
8  
9  
10  
11  
12  
13  
14  
15  
16  
17  
18  
19  
20  
21  
22  
23  
24  
25  
26  
27  
28  
29  
30  
31  
32  
33  
34  
35  
36  
37  
38  
39  
40  
41  
42  
43  
44  
45  
46  
47  
48  
49  
50  
51  
52  
53  
54  
55  
56  
57  
58  
59  
60

sampling strategy

---

(e) Describe any sensitivity analyses **Pages 8-9**

Continued on next page

For peer review only

**Results**

|                  |     |                                                                                                                                                                                                                                                                                                                                                                                                                                                                            |
|------------------|-----|----------------------------------------------------------------------------------------------------------------------------------------------------------------------------------------------------------------------------------------------------------------------------------------------------------------------------------------------------------------------------------------------------------------------------------------------------------------------------|
| Participants     | 13* | (a) Report numbers of individuals at each stage of study—eg numbers potentially eligible, examined for eligibility, confirmed eligible, included in the study, completing follow-up, and analysed <b>Page 9</b><br>(b) Give reasons for non-participation at each stage <b>Not done - LTFU presented</b><br>(c) Consider use of a flow diagram <b>Not done – not an RCT or controlled study</b>                                                                            |
| Descriptive data | 14* | (a) Give characteristics of study participants (eg demographic, clinical, social) and information on exposures and potential confounders <b>Page 9-11</b><br>(b) Indicate number of participants with missing data for each variable of interest <b>Each variable as number of participants</b><br>(c) <i>Cohort study</i> —Summarise follow-up time (eg, average and total amount) <b>Table 2-4</b>                                                                       |
| Outcome data     | 15* | <i>Cohort study</i> —Report numbers of outcome events or summary measures over time <b>Table 1-4</b><br><i>Case-control study</i> —Report numbers in each exposure category, or summary measures of exposure<br><i>Cross-sectional study</i> —Report numbers of outcome events or summary measures                                                                                                                                                                         |
| Main results     | 16  | (a) Give unadjusted estimates and, if applicable, confounder-adjusted estimates and their precision (eg, 95% confidence interval). Make clear which confounders were adjusted for and why they were included <b>Page 9-11</b><br>(b) Report category boundaries when continuous variables were categorized <b>Not applicable</b><br>(c) If relevant, consider translating estimates of relative risk into absolute risk for a meaningful time period <b>Not applicable</b> |
| Other analyses   | 17  | Report other analyses done—eg analyses of subgroups and interactions, and sensitivity analyses <b>Page 12, Table 5</b>                                                                                                                                                                                                                                                                                                                                                     |

**Discussion**

|                  |    |                                                                                                                                                                                               |
|------------------|----|-----------------------------------------------------------------------------------------------------------------------------------------------------------------------------------------------|
| Key results      | 18 | Summarise key results with reference to study objectives <b>Pages 13 and 20</b>                                                                                                               |
| Limitations      | 19 | Discuss limitations of the study, taking into account sources of potential bias or imprecision. Discuss both direction and magnitude of any potential bias <b>Pages 13-15</b>                 |
| Interpretation   | 20 | Give a cautious overall interpretation of results considering objectives, limitations, multiplicity of analyses, results from similar studies, and other relevant evidence <b>Pages 15-16</b> |
| Generalisability | 21 | Discuss the generalisability (external validity) of the study results <b>Pages 16-17</b>                                                                                                      |

**Other information**

|         |    |                                                                                                                                                                              |
|---------|----|------------------------------------------------------------------------------------------------------------------------------------------------------------------------------|
| Funding | 22 | Give the source of funding and the role of the funders for the present study and, if applicable, for the original study on which the present article is based <b>Page 23</b> |
|---------|----|------------------------------------------------------------------------------------------------------------------------------------------------------------------------------|

\*Give information separately for cases and controls in case-control studies and, if applicable, for exposed and unexposed groups in cohort and cross-sectional studies.

**Note:** An Explanation and Elaboration article discusses each checklist item and gives methodological background and published examples of transparent reporting. The STROBE checklist is best used in conjunction with this article (freely available on the Web sites of PLoS Medicine at <http://www.plosmedicine.org/>, Annals of Internal Medicine at <http://www.annals.org/>, and Epidemiology at <http://www.epidem.com/>). Information on the STROBE Initiative is available at [www.strobe-statement.org](http://www.strobe-statement.org).

# BMJ Open

## Laparoscopic excision of deep rectovaginal endometriosis in BSGE Endometriosis Centres: A multicentre prospective cohort study

|                                 |                                                                                                                                                                                                                                                                                                                                                                                                                                |
|---------------------------------|--------------------------------------------------------------------------------------------------------------------------------------------------------------------------------------------------------------------------------------------------------------------------------------------------------------------------------------------------------------------------------------------------------------------------------|
| Journal:                        | <i>BMJ Open</i>                                                                                                                                                                                                                                                                                                                                                                                                                |
| Manuscript ID                   | bmjopen-2017-018924.R1                                                                                                                                                                                                                                                                                                                                                                                                         |
| Article Type:                   | Research                                                                                                                                                                                                                                                                                                                                                                                                                       |
| Date Submitted by the Author:   | 10-Nov-2017                                                                                                                                                                                                                                                                                                                                                                                                                    |
| Complete List of Authors:       | Byrne, Dominic ; Royal Cornwall Hospitals Trust, Truro, Cornwall , Gynaecology<br>Curnow, Tamara; Bodriggy Health Centre, Hayle, Cornwall.<br>Smith, Paul; University of Birmingham,<br>Cutner, Alfred; University College London Hospitals, Gynaecology<br>Saridogan, Ertan; University College London Hospitals, Gynaecology<br>Clark, T; Birmingham Women's NHS Foundation Trust, Gynaecology;<br>University of Birmingham, |
| <b>Primary Subject Heading</b>: | Obstetrics and gynaecology                                                                                                                                                                                                                                                                                                                                                                                                     |
| Secondary Subject Heading:      | Obstetrics and gynaecology                                                                                                                                                                                                                                                                                                                                                                                                     |
| Keywords:                       | Laparoscopy, bowel endometriosis, deep infiltrating endometriosis, rectal endometriosis, rectovaginal endometriosis                                                                                                                                                                                                                                                                                                            |
|                                 |                                                                                                                                                                                                                                                                                                                                                                                                                                |

SCHOLARONE™  
Manuscripts

**Title**

Laparoscopic excision of deep rectovaginal endometriosis in BSGE Endometriosis Centres:  
A multicentre prospective cohort study

D Byrne, T Curnow, P Smith, A Cutner, E Saridogan, TJ Clark

Mr Dominic Byrne, MB BS, MD FRCOG, Consultant Gynaecologist, Royal Cornwall  
Hospitals Trust, Truro, Cornwall

Dr Tamara Curnow, DPhil, DRCOG, MMath, GP Partner, Bodriggy Health Centre, Hayle,  
Cornwall.

Mr Paul Smith, PhD, MB ChB, MRCOG, NIHR Clinical Lecturer, Birmingham Women's NHS  
Foundation Trust, and School of Clinical and Experimental Medicine,

Mr Alfred Cutner, MD FRCOG, Consultant Gynaecologist, University College London  
Hospitals

Mr Ertan Saridogan, PhD, FRCOG, Consultant Gynaecologist, University College London  
Hospitals

Professor T. Justin Clark, MB ChB, MD, FRCOG, Consultant Obstetrician and  
Gynaecologist and Honorary Professor, Birmingham Women's NHS Foundation Trust and  
University of Birmingham, (corresponding author) on behalf of the BSGE Endometriosis  
centres Scientific Advisory Group

Address for correspondence: Professor T. Justin Clark, Consultant Obstetrician and  
Gynaecologist and Honorary Professor, Birmingham Women's NHS Foundation Trust and  
University of Birmingham, Birmingham, B15 2TG

E-mail: [t.j.clark@doctors.org.uk](mailto:t.j.clark@doctors.org.uk)

Tel: 0044 121 607 4712

## Abstract

Objective: To estimate the effectiveness and safety of laparoscopic surgical excision of rectovaginal endometriosis.

Design: A multicentre, prospective cohort study

Setting: 51 hospitals accredited as specialist Endometriosis Centres.

Participants: 5,162 women of reproductive age with rectovaginal endometriosis of which 4,721 women had planned laparoscopic excision.

Interventions: Laparoscopic surgical excision of rectovaginal endometriosis requiring dissection of the para-rectal space.

Main outcome measures: Standardised symptom questionnaires enquiring about chronic pelvic pain, bladder and bowel symptoms, analgesia use and quality of life (EuroQol) completed prior to surgery and at 6, 12 and 24 months post-operatively. Serious peri- and post-operative complications including major haemorrhage, infection and visceral injury were recorded.

Results: At 6 months post surgery there were significant reductions in premenstrual, menstrual and non-cyclical pelvic pain, deep dyspareunia, dyschezia, low back pain and bladder pain. In addition, there were significant reductions in voiding difficulty, bowel frequency, urgency, incomplete emptying, constipation and passing blood. These reductions were maintained at two years, with the exception of voiding difficulty. Global quality of life significantly improved from a median pre-treatment score of 55/100 to 80/100 at six months. There was a significant improvement in quality of life in all measured domains and in quality-adjusted life-years. These improvements were sustained at two years. All analgesia use was reduced and in particular opiate use fell from 28.1% prior to surgery to 16.1% at six months. The overall incidence of complications was 6.8% (321/4721). Gastrointestinal



1  
2  
3 complications (enterotomy, anastomotic leak or fistula) occurred in 52 (1.1%) operations and  
4 of the urinary tract (ureteric / bladder injury or leak) in 49 (1.0%) procedures.  
5  
6

7 Conclusion: Laparoscopic surgical excision of rectovaginal endometriosis appears to be  
8 effective in treating pelvic pain and bowel symptoms and improving health-related quality of  
9 life and has a low rate of major complications when performed in specialist centres.  
10  
11  
12

13  
14 Keywords: Laparoscopy; bowel endometriosis; deep infiltrating endometriosis; rectal  
15 endometriosis; rectovaginal endometriosis  
16  
17  
18  
19  
20  
21  
22  
23  
24  
25  
26  
27  
28  
29  
30  
31  
32  
33  
34  
35  
36  
37  
38  
39  
40  
41  
42  
43  
44  
45  
46  
47  
48  
49  
50  
51  
52  
53  
54  
55  
56  
57  
58  
59  
60

### Article summary – Strengths and limitations

- Our study is by far the largest , multcentre observational cohort published for the laparoscopic surgical treatment of rectovaginal endometriosis with a sample of nearly 5000 cases.
- Data were prospectively collected, minimising missing data and recall bias, were obtained from multiple centres enhancing transferability, and outcomes measurements were patient reported reducing interpreter bias.
- Efficacy outcomes were assessed in both the short term (at six months) and longer term (at two years) following surgery. In addition, the scale of these data and the method of collection have enabled a robust assessment of the risk of complications from this type of surgery. The reported incidence of complications cannot however, be used as indicative risk for patients who have care given in non-specialist endometriosis centres.
- The main limitation of our study relates to missing data from incomplete data entry, incomplete follow-up or uncompleted follow up at closure of the study. We performed sensitivity analyses to explore the robustness of our results to incompleteness. The results were stable, remaining significant in some cases even when symptomatic outcomes for those women with missing data were assumed to be the worst possible outcome.
- Historical control data were used from the same patients prior to surgical intervention although the study would have benefited from a non-surgically treated control group. However, persuading a group of women with severe, refractory symptoms to continue with non-surgical treatment would be challenging.

## Introduction

Endometriosis is a common and serious problem for women in their reproductive years and can cause chronic pelvic pain, subfertility, bowel and urinary dysfunction.<sup>1</sup> The associated morbidity places a substantial economic burden on society as a result of direct healthcare costs and indirect productivity losses. In the USA, direct healthcare costs have been estimated to be \$2,801 annually per patient with an additional cost of \$1,023 annually per patient due to loss of productivity. Overall the costs associated with endometriosis in the USA are estimated at 22 billion dollars per annum.<sup>2</sup>

Deep endometriosis in the posterior pelvis frequently affects the space between the anterior wall of the rectosigmoid and the posterior vaginal wall and is usually referred to as rectovaginal endometriosis. There is limited evidence supporting the sustained effectiveness and acceptability of medical therapies in improving the symptoms of rectovaginal endometriosis.<sup>3-5</sup> Consequently surgical treatment has been proposed to completely excise the deep rectovaginal disease.<sup>6-8</sup>

Advances in instrumentation and surgical experience have led to laparoscopic treatment superseding alternative surgical routes such as laparotomy and transvaginal excision. Previous studies have reported improvements in generic quality of life data following surgical excision of endometriosis involving the bowel, but these evaluations have been undertaken using small cohorts of women usually from single centres, affecting the precision and generalisability of the derived results.<sup>9-11</sup> Whilst these findings of improved symptomatic outcomes are promising, it is well recognised that surgery for deep endometriosis with bowel involvement is complex and can be associated with serious and potentially life threatening complications.<sup>10</sup> For these reasons, the ESHRE Guidelines on the 'Management of women with endometriosis' recommend that clinicians refer women with suspected or diagnosed

1  
2  
3 deep endometriosis to a centre of expertise that offers all available treatments in a  
4 multidisciplinary context.<sup>1</sup>  
5  
6  
7

8  
9 In 2006 the British Society for Gynaecological Endoscopy (BSGE) developed specialist  
10 endometriosis centres (Endocentres), where patients would be treated by surgeons who  
11 work in multidisciplinary teams, audit their outcomes and perform sufficient workload to  
12 maintain their surgical skills.<sup>12</sup>  
13  
14  
15

16  
17  
18 In view of the paucity of world literature data pertaining to the effectiveness and safety of this  
19 highly complex surgery for a common gynaecological condition, we undertook a prospective,  
20 multi-centre cohort study to estimate (i) effectiveness of surgery on patient reported  
21 symptoms associated with endometriosis as well as its impact upon women's health related  
22 quality of life and (ii) safety by examining rates of surgical complications using data collected  
23 from the BSGE Endocentres dataset.  
24  
25  
26  
27  
28  
29  
30  
31  
32

### 33 **Methods**

#### 34 *Study design*

35  
36  
37  
38 A multicentre prospective cohort study of pre-menopausal women undergoing surgery for  
39 pelvic pain associated with rectovaginal disease resistant to medical treatment or  
40 conservative surgical therapy was performed. Standardised diagnostic, operative,  
41 histological and patient outcome data were prospectively collected from 51 BSGE  
42 Endometriosis centres between 1<sup>st</sup> January 2009 and 30<sup>th</sup> June 2016.  
43  
44  
45  
46  
47  
48

#### 49 *Study population*

50  
51 Women treated in a BSGE Endocentre who underwent laparoscopic excision of deep  
52 rectovaginal endometriosis, which required dissection of the pararectal space and gave  
53 written consent for data collection were included in the study. Dissection of the pararectal  
54  
55  
56  
57  
58  
59  
60

1  
2  
3 space was chosen as the inclusion criterion for cases to be studied because access to this  
4 anatomical space is necessary to free adherent bowel prior to excision of deep rectovaginal  
5 disease. Furthermore, this operative step is necessary irrespective of the type of surgery  
6 performed on the bowel. So by choosing this step of the surgical procedure the BSGE could  
7 be assured that all cases of deep rectovaginal endometriosis would be included reducing the  
8 risk of selection bias. Clear explanation of dissection of the deep pararectal space is  
9 provided on the BSGE endometriosis database for surgeons. Whilst there have been a  
10 number of historical scoring systems for endometriosis, some were not developed prior to  
11 the inception of the BSGE project and none have been universally accepted.<sup>13-16</sup> In order to  
12 retain accreditation as a BSGE Endocentre, all consenting patients who undergo surgery for  
13 deep rectovaginal endometriosis that includes dissection of the pararectal space in an  
14 Endocentre must have their data entered on to the BSGE national endometriosis database.

#### 26 27 *Clinical data*

28  
29 Standardised patient symptom data and quality of life (QoL) assessments were collected  
30 prior to surgery as a baseline control. The assessments were repeated at six months, one  
31 year and two years after surgery. To ensure consistent timing of follow-up, the database only  
32 accepts post-operative data entry within an interval from four weeks before the exact date  
33 required and up to eight weeks after the exact date.

34  
35 All patients recorded their clinical symptoms on a BSGE standard questionnaire using a 0-10  
36 point Likert scale for premenstrual pain, menstrual pain, non cyclical pelvic pain, deep  
37 dyspareunia, cyclical dyschezia, non cyclical dyschezia, lower back pain, bladder pain and  
38 voiding difficulty. In addition, patients recorded details of bowel function with graded  
39 answers for; frequency of bowel movement, urgency of bowel movement, incomplete  
40 emptying sensation, constipation and blood in the stool. Patient reported quality of life data  
41 were collected using EuroQol 5D-3L questionnaire and EuroQuol Visual Analogue  
42 Score.<sup>17,18</sup> The five domains of the EuroQol 5D-3L questionnaire were combined to compute  
43 a single weighted index score (a more sensitive measure of quality of life) using the standard  
44  
45  
46  
47  
48  
49  
50  
51  
52  
53  
54  
55  
56  
57  
58  
59  
60

1  
2  
3 UK time trade-off health-state valuation<sup>19</sup> (as used by NICE for assessing quality-adjusted  
4 life years (QALYs)) . In this EQ5d index score 1 represents full health and 0 represents  
5 death. There are some health states that are assigned negative values (i.e. worse than  
6 death).  
7  
8  
9

10  
11 Dichotomous data ('yes or 'no') were collected for use of analgesia (paracetamol, non  
12 steroidal anti-inflammatory drug (NSAID) or opiates) and medical therapy (oral contraceptive  
13 pill, Mirena Intrauterine system™ (Bayer, Germany), GNRH analogues alone, GNRH  
14 analogues plus add back hormone replacement, systemic progestogens or aromatase  
15 inhibitors).  
16  
17  
18  
19  
20  
21

### 22 *Surgical data*

23  
24  
25 Details of previous endometriosis surgery were recorded including adnexal surgery and  
26 hysterectomy. Surgical details were collected using a standard dataset describing the name  
27 and level of the surgeon, whether a colorectal and/or a urological surgeon also undertook  
28 the surgery and whether the surgery was laparoscopic or laparotomic. The distribution of  
29 any endometriosis deposits was described by 'yes' or 'no', for right and left pelvic side-wall,  
30 right and left endometrioma, right and left uterosacral ligament and obliteration of the pouch  
31 of Douglas. Bowel involvement of endometriosis was also recorded dichotomously for 'rectal  
32 involvement', 'rectovaginal nodule', or involvement of 'appendix', 'small bowel' and  
33 'rectosigmoid'. Co-existent bladder endometriosis was recorded by yes or no for superficial  
34 bladder, deep bladder and deep utero-vesical endometriosis.  
35  
36  
37  
38  
39  
40  
41  
42  
43  
44

45  
46 The surgeon recorded the surgical procedure for each of the above areas of distribution of  
47 endometriosis from a list of; 'ablated', 'excised', 'ablated and excised', 'not treated' or 'not  
48 present'. Surgery on any endometrioma present was recorded by selecting from a list of;  
49 'ablated', 'excised', 'oophorectomy', 'drained only', 'not treated' or 'not applicable'.  
50  
51  
52

53  
54 Pararectal space dissected was recorded as yes or no. Surgery on a rectovaginal nodule  
55 was recorded as 'ablated', 'excised', 'not treated' or 'not applicable'. Opening of the vagina  
56  
57  
58  
59  
60

1  
2  
3 as part of the surgery was recorded as 'yes', 'no' or 'not applicable'. The type of bowel  
4 surgery was recorded by selecting from a list of; 'not applicable', 'not treated', 'shaved', 'disc  
5 resection' or 'segmental resection', along with whether a stoma was formed, or not. Surgery  
6 on any bladder endometriosis was recorded as; 'ablated', 'excised without bladder opening',  
7 'excised with bladder opening', 'not present' or 'not treated'. Ureteric endometriosis surgery  
8 was described by ureteric nodule excised (yes, no or not present), right ureterolysis (yes, no  
9 or not applicable), left ureterolysis (yes, no or not applicable), JJ stent (yes or no). Finally,  
10 data were collected regarding performance of a concomitant hysterectomy (yes, no or not  
11 applicable) with space for free text.

12  
13  
14  
15  
16  
17  
18  
19  
20  
21 Recording of complications was divided into two sections with 'yes' or 'no' answers for a  
22 standardised list of perioperative and post operative complications. Complication data  
23 included surgical injury to urological, gastrointestinal or vascular structures, unplanned  
24 procedures including conversion to laparotomy, infective morbidity, pulmonary embolism and  
25 death. Histology of removed specimens was examined for malignant transformation.

### 26 27 28 29 30 31 32 *Statistical Methods*

33  
34 Data were analysed according to the study eligibility criteria, namely: a valid operation date  
35 was entered, the intended operation was via a laparoscopy, the para-rectal space was  
36 dissected and there was excision of endometriosis. If duplicate data were present, the most  
37 complete dataset was used. Centres which entered fewer than 20 cases in the total study  
38 period were excluded.

39  
40  
41  
42  
43  
44  
45 Non-numerical scores (eg: bowel symptoms) and the EuroQoL 5D-3L were coded  
46 numerically with an assumed underlying interval scale. Median scores were computed  
47 along with the 95% confidence interval about the median.

48  
49  
50  
51 For the patient reported data, pair-wise comparisons were made using the baseline pre-  
52 operative data as a control. Data were thus only included if both the pre-operative and the  
53 relevant post-operative data were entered. We also compared the symptom scores at six  
54  
55  
56  
57  
58  
59  
60

1  
2  
3 months with those at two years to assess the post-operative trend. The Mann Whitney U test  
4 (Wilcoxon rank sum) was used for comparison for data with more than two outcomes and  
5 the sign test for dichotomous data. A statistic was considered significant if the probability of  
6 it occurring by chance was  $<0.05$  on a two-tailed test.  
7  
8  
9

10  
11 As post-operative follow-up was incomplete, the impact of this was assessed in two ways.  
12  
13 The first method was by restricting the analysis to centres with more complete follow-up;  
14 defined as centres performing at least 50 operations in the study period, with more than 90%  
15 of pre-operative questionnaires and more than 70% of post-operative questionnaires entered  
16 onto the BSGE database for at least one post-operative clinical follow-up period. The second  
17 method was to include all women for whom a pre-operative, baseline score was present. If  
18 the post-operative results were reported then these were used. If the post-operative results  
19 were not present then an assigned score was used. . The assigned score was the same for  
20 all patients with missing post-operative data. The assigned score was initially the best  
21 outcome possible and was then changed stepwise through less desirable outcomes. With  
22 each assigned value the significance calculation was repeated. The last value of the  
23 assigned score at which the outcome is still significant gives a measure of the sensitivity of  
24 the result to the missing data. If, for example, the statistic is still significant with the worst  
25 possible outcome assigned to the missing post-operative dataset then the outcome is  
26 effectively independent of the missing responses.  
27  
28  
29  
30  
31  
32  
33  
34  
35  
36  
37  
38  
39  
40

41 The data analysis was performed using Matlab (MathWorks) version R2011b.  
42  
43  
44  
45  
46

## 47 **Results**

48  
49  
50  
51

52 In BSGE Endocentres between 1<sup>st</sup> Jan 2009 and 30<sup>th</sup> June 2016, 5,162 women underwent  
53 surgery for deep rectovaginal endometriosis, which included dissection of the pararectal  
54 space. Women who underwent planned laparotomy (160; 3.1%), only had ablative  
55  
56  
57  
58  
59  
60



1  
2  
3 treatment of their endometriosis (100; 1.9%), or had no treatment of their endometriosis  
4 (181; 3.5%) were excluded from further analysis. Thus a total of 4,721 women had planned  
5 laparoscopic excision of deep rectovaginal endometriosis in a total of 51 Endocentres.  
6  
7  
8 Previous surgery for endometriosis had been performed in 55.1% (2,602) of these women,  
9 with 7.0% (333) having had one ovary removed, 3.0% (141) both ovaries removed and 5.0%  
10 (234) having had a hysterectomy. The median age of women having surgery was 35.1 years  
11 (90<sup>th</sup> centile range 25.9 - 44.8 years).  
12  
13  
14  
15

### 16 17 *Surgical findings and procedures*

18  
19  
20 At surgery endometriosis was identified on the left pelvic side wall in 69.0% (3,259) patients  
21 and on the right side wall in 57.7% (2,726). It was on the left uterosacral ligament in 78.4%  
22 (3,702) patients and the right uterosacral ligament in 70.8% (3,341). The pouch of Douglas  
23 was obliterated in 67.1% (3,167) women and a rectovaginal nodule present in 68.6% (3,238)  
24 women. There was endometriosis present on the rectum in 54.7% (2,582) women, the  
25 caecum in 1.3% (60) women, the appendix in 2.3% (110) women, small bowel in 1.6% (75)  
26 women and rectosigmoid in 18.1% (856) women. Deep uterovesical disease was present in  
27 422 women (8.9%).  
28  
29  
30  
31  
32  
33  
34  
35

36  
37 Gonadotrophin releasing hormone agonists were given to 23.0% (1087) women prior to  
38 surgery. The operation was undertaken by a senior gynaecologist in 96.4% (4,549) cases  
39 and a colorectal surgeon was present in 27.6% (1,304) cases and a urologist in 320 (6.8%)  
40 cases. Pararectal dissection was performed in all cases and ureterolysis on the left in  
41 65.5% (3,092) and on the right in 57.1% (2,695) cases. A ureteric nodule of endometriosis  
42 was excised in 9.0% (424) and JJ ureteric stents used in 9.2% (434) cases. Bowel surgery  
43 was performed in 63.1% (2,981) cases and 1.3% (62) women had a stoma. A hysterectomy  
44 was performed in 723 (15.3%) women. Conversion to laparotomy occurred in 41 (0.9%)  
45 cases. There were no cases of malignancy in any of the endometriosis specimens.  
46  
47  
48  
49  
50  
51  
52  
53  
54

### 55 *Follow up performance*

1  
2  
3 Whilst preoperative data were expected in 4,721 women, symptom data were available for  
4 4,210 (89%) and QoL data for 4,041 (86%) women. At six months follow up symptom scores  
5 were available in 2,350 (50%) and QoL scores in 2241 (47%) of women. At one year post  
6 operation, data were expected for 3,977 women, of whom symptom data were present in  
7 1499 (38%) and QoL in 1380 (35%). At two years symptom data were present in 729 (27%)  
8 and QoL data in 644 (24%) out of a possible 2,704 women.  
9  
10  
11  
12  
13

14  
15 In the seven endocentres with most complete follow up; preoperative symptom data were  
16 available for 684 (97%) of the 707 women and QoL data for 668 (94%) women. At six  
17 months symptom data were present for 537 (76%) and QoL data for 530 (75%) women. At  
18 one year post surgery, data were expected from 553 women and symptom data were  
19 present in 356 (64%) and QoL in 347 (63%) women. At two years post operation data were  
20 expected in 319 women and symptom data were present for 160 (50%) and QoL data in 145  
21 (45%) women.  
22  
23  
24  
25  
26  
27  
28  
29

### 30 *Symptom outcomes*

31  
32 At six months after laparoscopic excision of endometriosis there was a significant reduction  
33 in pain scores for premenstrual pain (from a median of 7/10 to 3/10), menstrual pain (from  
34 9/10 to 5/10) and non cyclical pelvic pain (from 6/10 to 2/10) when compared to pre-  
35 operative scores. A significant reduction in pain scores also occurred for deep dyspareunia  
36 (from 6/10 to 1/10), cyclical (6/10 to 1/10) and non-cyclical dyschezia (3/10 to 0/10), low  
37 back pain (6/10 to 3/10) and a statistically significant drop in bladder pain although no  
38 change in the median score. In addition, there was a statistically significant (although not  
39 clinically significant) reduction in voiding difficulty, bladder pain, bowel frequency, bowel  
40 urgency, incomplete bowel emptying, constipation and passing blood in the stool (see table  
41 1).  
42  
43  
44  
45  
46  
47  
48  
49  
50  
51

52  
53 The same statistically significant reduction in symptoms remained present at two years post  
54 surgery for all symptoms except voiding difficulty. A comparison of the symptoms at six  
55  
56  
57  
58  
59  
60

1  
2  
3 months was made with the symptoms at two years in order to assess the post-operative  
4 trend in symptom scores. This showed that there was a statistically significant but clinically  
5 small increase in all symptoms except voiding difficulty over the 18 months (see table 1).  
6  
7

8  
9 The median global QoL on a 100 point visual analogue scale improved from 55 pre-  
10 operatively to 80 post-operatively. There was no statistically significant degradation in effect  
11 between 6 and 24 months in all measured QoL domains with the exception of the visual  
12 analogue score, which showed a statistically significant (although clinically negligible)  
13 lessening over this timeframe (see table 2, median score dropped from 80/100 to 76/100).  
14 Patient reported QoL for all five domains of the EuroQol questionnaire showed a statistically  
15 significant improvement in QoL at six months post surgery that was sustained at two years  
16 post surgery. These five domains are combined to give a single weighted index score  
17 (EQ5D index) which can be used as a measure of quality-adjusted life years. This more  
18 sensitive measure showed a clinically significant improvement (from a mean of 0.525 to  
19 0.756) at 6 months post surgery that was sustained at two years (0.751).  
20  
21  
22  
23  
24  
25  
26  
27  
28  
29  
30

31 Analgesia use was significantly reduced at six and 24 months post surgery compared to pre-  
32 operative levels for all three analgesic types. Paracetamol use dropped from 76.0% patients  
33 to 59.8% at 6 months, NSAID use dropped from 69.8% patients to 48.9% at 6 months and  
34 opiate use dropped from 28.1% patients to 16.1% at 6 months. There was however a  
35 statistically significant (although clinically small) increase in paracetamol, NSAID and opiate  
36 use between six and 24 months post-operatively (see table 3).  
37  
38  
39  
40  
41  
42  
43

#### 44 *Sensitivity analyses*

45  
46 Sensitivity analysis on the reduction of patient reported symptoms and the improvement in  
47 quality of life post surgery was used to estimate the effect of incomplete data on the  
48 significance of the results and is shown in table 4. For all symptoms except voiding difficulty,  
49 constipation and blood in the stool, the median scores for missing post-operative data at 6  
50 months would have to be higher (worse) than at baseline for change in scores to become  
51  
52  
53  
54  
55  
56  
57  
58  
59  
60

1  
2  
3 statistically non-significant. Indeed, menstrual pain scores at six months remained  
4 significantly improved on the pre-operative scores even if all the missing six month scores  
5 are assumed to be 10 (maximum pain). To further test the robustness of the data to missing  
6 values, data from the seven centres with the best follow-up were analysed separately (see  
7 table 5, supplementary tables 1-3). Improvement in premenstrual pain, menstrual pain, non-  
8 cyclical pelvic pain, deep dyspareunia, cyclical dyschezia, lower back pain, EQ-VAS and  
9 EQ5D index were all statistically significant even if the missing data scores were of the worst  
10 possible outcome.  
11  
12  
13  
14  
15  
16  
17

### 18 *Surgical complications*

19  
20  
21  
22 The overall incidence of complications was 6.8% (321), with perioperative complications in  
23 4.7% (220) operations and late operative complications in 2.5% (120) women, including 19  
24 women suffering both peri, and postoperative complications (see table 6). Bowel  
25 complications occurred in 1.1% (52 operations) and the incidence varied according to  
26 whether bowel surgery was undertaken and if so, what type of procedure; 0.6% (11) where  
27 no coexistent bowel surgery was undertaken, 1.1% (29), with bowel shaving, 9.3% (5) with  
28 disc resection and 3.9% (7) with segmental bowel resection (see table 7).  
29  
30  
31  
32  
33  
34  
35  
36  
37  
38

## 39 **Discussion**

### 40 *Statement of principal findings*

41  
42  
43  
44 Laparoscopic excision of severe rectovaginal endometriosis, performed in specialist centres  
45 in women with chronic pelvic pain, was associated with significant reduction in pain  
46 symptoms and improved health related quality of life. Moreover, the reduction in pain and  
47 increased quality of life observed six months following surgery was maintained at two years.  
48 All types of pain symptoms improved; pre-menstrual pain, menstrual pain, non-cyclical pain,  
49 back pain, pain with sexual intercourse, voiding and on opening the bowels. A significant  
50 reduction in the need for analgesia supported the findings of an overall reduction in pain  
51  
52  
53  
54  
55  
56  
57  
58  
59  
60

1  
2  
3 symptoms. Bowel symptoms including frequency, urgency, incomplete emptying and  
4 constipation also improved. This type of surgery requires enhanced laparoscopic skills,  
5 primarily because of the need to overcome distorted anatomy and operate in proximity to  
6 delicate gastrointestinal, genitourinary and vascular structures. However, clinical outcomes  
7 were good, and the rates of serious peri-operative and late complications were low, when  
8 laparoscopic excision of rectovaginal endometriosis was conducted in recognised, specialist  
9 centres.  
10  
11  
12  
13  
14  
15

### 16 17 *Strengths and weaknesses of the study*

18  
19  
20 Our study has many strengths which include the size of the sample with nearly 5000 cases,  
21 the largest dataset by far reported to date in the world literature. These data were collected  
22 prospectively, minimising missing data and recall bias, were obtained from multiple centres  
23 enhancing transferability, and outcomes measurements were patient reported reducing  
24 interpreter bias. Efficacy outcomes were assessed in both the short term (at six months) and  
25 longer term (at two years) following surgery. In addition, the scale of these data and the  
26 method of collection have enabled a robust assessment of the risk of complications from this  
27 type of surgery. Precise estimates of efficacy of surgery and associated complication rates  
28 to inform clinical decision making have been lacking because relevant data available in the  
29 literature have been derived from small, single centre case series<sup>9,10,20,21</sup> and in many such  
30 publications the severity of endometriotic disease has been heterogeneous or not  
31 defined.<sup>9,10,20,21</sup> We are aware of no other data set that has examined the laparoscopic  
32 management of rectovaginal endometriosis when it is applied across a country according to  
33 accepted best practice and within nationally approved guidance<sup>6</sup>. Although there may be  
34 some units in the UK that do not submit data to the BSGE national database, this would be  
35 the exception for any NHS unit carrying out large volumes of surgery as this has become the  
36 standard for commissioning of endometriosis services by NHS England.  
37  
38  
39  
40  
41  
42  
43  
44  
45  
46  
47  
48  
49  
50  
51  
52

53  
54 The main limitation of our study relates to missing data from incomplete data entry,  
55 incomplete follow-up or uncompleted follow up at closure of the study. We performed  
56  
57  
58  
59  
60

1  
2  
3 sensitivity analyses to explore the robustness of our results to incomplete follow up. The  
4 results were stable, remaining significant in some cases even when symptomatic outcomes  
5 for those women with missing data were assumed to be the worst possible outcome.  
6  
7 Furthermore, when we restricted analysis to the seven centres providing the most complete  
8 follow-up, the observed improvement in clinical symptoms and quality of life were  
9 reproduced. Thus, it is unlikely that the impact of missing data would substantially alter  
10 clinical inferences on the efficacy of laparoscopic surgery for severe rectovaginal  
11 endometriosis.  
12  
13  
14  
15  
16  
17  
18

19 We did not routinely collect data regarding BMI which may impact upon the incidence of  
20 surgical complications. Moreover, we did not collect data pertaining to reproductive history  
21 and fertility. Thus, we cannot comment upon the impact of these factors on clinical outcomes  
22  
23 Whilst the lack of these baseline data may limit the generalisability of our findings we believe  
24 that our results are likely to remain externally valid in light of the magnitude and multi-centre  
25 nature of our series. We evaluated symptoms relating to bowel function in addition to  
26 reporting pain symptoms known to be associated with endometriosis. However, condition-  
27 specific validated instruments assessing bowel symptoms in rectovaginal endometriosis are  
28 lacking. The data we provide are germane to the symptoms our patients with endometriosis  
29 complain of and as such we believe have face validity. We did not collect pain diaries where  
30 detail regarding the dose and pattern of analgesic use could be obtained. As we collected a  
31 large amount of data pertaining to pain, urinary and bowel function and the impact of  
32 symptoms of quality of life, we adopted a pragmatic approach, limiting our enquiry to what  
33 type of analgesia was being used at the time of follow up. In this way we hoped to minimise  
34 the burden on the individual patient to respond enhancing completeness of data entry and  
35 follow up. A final limitations relates to our use of historical control data from the same  
36 patients prior to surgical intervention whereas the study would have benefited from a non-  
37 surgically treated control group. However, persuading a group of women with severe,  
38 refractory symptoms to continue with non-surgical treatment would be challenging.  
39  
40  
41  
42  
43  
44  
45  
46  
47  
48  
49  
50  
51  
52  
53  
54  
55  
56  
57  
58  
59  
60

1  
2  
3  
4  
5 Despite the complexity of the surgery, the overall reported perioperative and post-operative  
6 serious complication rates were relatively low at 4.7% and 2.5% respectively. Conversion to  
7 laparotomy occurred in less than 1% of cases demonstrating advances in acquisition of  
8 laparoscopic surgical skills, training and equipment. Excision of endometriosis in the  
9 posterior pelvis is a difficult surgical procedure but the improved vision and precision that  
10 laparoscopy provides may improve completeness of excision and, in skilled hands, minimise  
11 the risk of complications. The ureteric injury rate of 0.5% was similar to those reported in  
12 smaller series from single centres and that associated with hysterectomy.<sup>22</sup> Bowel trauma,  
13 namely unintended bowel injuries, leaking from bowel surgery and recto-vaginal fistula  
14 formation occurred in 1.2% of cases. In the context of the morbidity associated with  
15 rectovaginal endometriosis, its resistance to conventional medical treatments and the  
16 nature, complexity and efficacy of surgery, this rate of complications appears to be  
17 acceptable. Moreover, the rates of adverse events are comparable to other series from  
18 expert, single centres.<sup>20-22</sup> The reported incidence of complications cannot however, be  
19 used as indicative risk for patients who have care given in non-specialist endometriosis  
20 centres.  
21  
22  
23  
24  
25  
26  
27  
28  
29  
30  
31  
32  
33  
34  
35  
36

37  
38 *Strengths and weaknesses in relation to other studies, discussing important differences in*  
39 *results*  
40

41  
42 The findings from the current study which is the largest, multicentre series by far to be  
43 reported to date, are in keeping with those published from smaller, single centre  
44 observational cohorts of women undergoing laparoscopic excision of deep endometriosis.  
45 Significant reductions in the intensity of chronic pelvic pain, dysmenorrhoea, dyspareunia  
46 and dyschezia were reported from series in the UK (57 and 137 women)<sup>11,21</sup>, Finland (22  
47 women)<sup>20</sup>. The majority of studies included in a recent extensive literature review of surgical  
48 treatment of deep endometriosis with colorectal involvement also reported improvements in  
49 pain and digestive symptoms as well as health related quality of life, although few studies  
50  
51  
52  
53  
54  
55  
56  
57  
58  
59  
60



1  
2  
3 reported this latter outcome.<sup>10</sup> The size of the 49 included studies ranged from four to 283  
4 cases and the total number of operations evaluated were 1791 of which 679 (38%) were  
5 rectal shaving procedures, 375 (21%) disc resections and 737 (41%) segmental resections.  
6  
7 However, comparisons between studies were not possible because of inadequate reporting  
8 (many included studies reported 'overall improvement'), as well as inconsistent assessment,  
9 of clinical outcomes (e.g. use of interviews, bespoke questionnaires, visual analogue  
10 scales). A systematic review of 34 articles describing 1889 segmental bowel resections also  
11 showed that the vast majority of women had significant improvement in chronic pelvic pain,  
12 dysmenorrhea, dyspareunia and dyschezia at one year<sup>9</sup>.  
13  
14

15  
16 Safety, in addition to efficacy is necessary to justify undertaking complex laparoscopic  
17 procedures for a benign pathology albeit a condition associated with substantial morbidity.  
18 Haemorrhage greater than one litre was the most common peri-operative complication  
19 occurring in 0.9% of cases. This rate is consistent with the available literature where  
20 haemorrhage requiring blood transfusion in complicated procedures (0.3%-3.1%) depending  
21 upon the type of bowel surgery.<sup>10</sup> Similarly our peri-operative and post-operative  
22 complication rates were comparable to the mean (range) of complications reported within a  
23 recent review of 49 case series<sup>10</sup>: rectovaginal fistulae 0.3% vs. 2.7% (0%-11%);  
24 enterostomy 0.5% vs. 1.2% (0.0% - 7.0%) and pelvic abscess 0.4% vs. 0.3% (0.0% - 4.0%).  
25  
26 Complication data from a systematic review restricted to segmental bowel resection reported  
27 a 6.4% rate of severe bowel complications (leakage 1.9%; fistula 1.8%; severe obstruction  
28 2.7%), 2.5% rate of haemorrhage and 1% severe infection rate.<sup>9</sup> Our ureteric injury rate of  
29 0.5% is in keeping with the 1% reported in another series<sup>21</sup> as is the low observed  
30 prevalence of unintended bowel injury, major vascular injury and urinary tract fistula.<sup>20-22</sup>  
31  
32

#### 33 *Meaning of the study: possible explanations and implications for clinicians and policymakers*

34  
35 This study demonstrates that women having laparoscopic excisional surgery for rectovaginal  
36 endometriosis obtain significant symptomatic relief, reduction in analgesia use and  
37 improvement in their quality of life. These improvements are present at six months and  
38  
39  
40  
41  
42  
43  
44  
45  
46  
47  
48  
49  
50  
51  
52  
53  
54  
55  
56  
57  
58  
59  
60



1  
2  
3 sustained at two years, with the exception of voiding difficulty. The lack of improvement in  
4 this symptom may be explained by the fact that the presence of bladder endometriosis was  
5 not an inclusion criterion for this study and so voiding complaints may be an independent  
6 symptom. This study cannot predict outcomes more than two years post-operatively but it  
7 is very encouraging that the worsening of symptom scores, analgesia use and quality of life  
8 scores post-operatively (from six months to two years) is extremely small compared to the  
9 large clinical improvement seen initially.  
10  
11  
12  
13  
14  
15

16  
17 Rectovaginal endometriosis sits between the vagina and the rectum and thus the most  
18 consistent symptom differentiating it from the pain associated with less severe and other  
19 forms of endometriosis or adenomyosis, is pain on intercourse or 'dyspareunia'. In addition,  
20 in the more severe groups, pain on defaecation is a common symptom due to the proximity  
21 to, or invasion of, the bowel. Thus it is reassuring that the surgery resulted in a significant  
22 improvement in these symptoms and that the effect lasted for the two years of follow up.  
23 One of the side effects of all surgery is scarring and it is possible that a rectovaginal nodule  
24 of endometriosis excised may be replaced by scar tissue leading to a resumption of  
25 dyspareunia. These data would suggest that this was not the case. In addition the long term  
26 effects of surgery would suggest a lack of significant recurrence during the time scale of the  
27 study.  
28  
29  
30  
31  
32  
33  
34  
35  
36  
37  
38  
39

40 Laparoscopic surgical excision of rectovaginal endometriosis appears to be effective in  
41 treating chronic pelvic pain, bowel and urinary symptoms and improving health related  
42 quality of life and has an acceptable major complication rate when performed in specialist  
43 surgical centres. Women with severe and refractory symptoms adversely impacting on their  
44 quality of life should be offered laparoscopic surgical treatment in recognised endometriosis  
45 centres, where clinical outcomes are objectively audited. Commissioners of health services  
46 should restrict these highly complex surgical treatments to specialist centres to ensure an  
47 adequate case-load and where expertise is demonstrated through provision of auditable  
48 clinical outcomes.  
49  
50  
51  
52  
53  
54  
55  
56  
57  
58  
59  
60

### *Unanswered questions and future research*

Future studies should collect relevant baseline clinical data including comprehensive population characteristics, indications for surgery and fertility desires. Serial, standardised short and long term follow up will enhance comparability of data and a better evaluation of the longer term effects of laparoscopic interventions for deep rectovaginal disease on symptoms. Relevant and valid outcomes should be chosen with the help of patient involvement and should include valid collection of health related quality of life data. Such studies should be controlled, where possible and ideally randomised to reduce selection bias. A randomised controlled trial (RCT) comparing excisional surgery and diagnostic laparoscopy with the same number of ports is difficult ethically because women in the placebo arm would have been referred for specialist treatment and thus would be undergoing an unnecessary surgical intervention. Future studies should consider randomising between laparoscopic surgery and non-surgical therapy or alternatively compare different laparoscopic surgical interventions. The morbidity associated with rectovaginal endometriosis has a substantial economic impact due to the related reduction in activity both socially and in the work place. Thus, any future studies should include formal economic analysis to weigh the costs of surgical management against clinical, health service and societal gains.

### **Conclusions**

This study presents by far the largest, multi-centre rectovaginal endometriosis surgical series in the literature both in relation to clinical outcomes and complication rates. Deep endometriosis is associated with a high disease burden and limited access to effective medical and surgical treatment is a large unmet need. Indeed, half our study population had undergone previous surgery for endometriosis mostly in non-specialist centres. Women suffer with chronic pain and psychological symptoms which impairs their quality of life.

1  
2  
3 Health services and the wider economy suffer through utilisation of substantial health care  
4 resources and restrictions placed upon women's physical functioning which can lead to  
5 absenteeism and the inability to fulfil domestic and professional duties.<sup>23</sup> The impact of  
6 endometriosis on quality of life is well recognised<sup>21,24-26</sup> and well demonstrated in the  
7 current study where the median pre-operative EQ global VAS score was only 55/100 and the  
8 median pre-operative EQ5D index score only 0.525. It is also widely acknowledged that  
9 surgical management of deep endometriosis involving the rectovaginal septum and/or bowel  
10 is technically challenging and can be associated with high rates of serious complications.  
11 However, women with deep endometriosis often have severe and refractory symptoms  
12 adversely impacting on their quality of life<sup>6-8</sup> justifying the need for effective surgical  
13 treatment even if associated with potentially serious complications.  
14  
15  
16  
17  
18  
19  
20  
21  
22  
23

24  
25 Our large, multicentre dataset demonstrates significant improvements in a variety of pain  
26 and functional bowel symptoms from laparoscopic excisional surgery. The substantial and  
27 sustained improvements in pain symptoms and health related quality of life and reassuringly  
28 low rates of major perioperative and post-operative complications supports this form of  
29 surgical treatment when conducted in specialist endometriosis centres. Future studies  
30 should include formal economic analyses to weigh the costs of surgical management against  
31 clinical, health service and societal gains.  
32  
33  
34  
35  
36  
37  
38  
39  
40  
41  
42  
43  
44  
45  
46  
47  
48  
49  
50  
51  
52  
53  
54  
55  
56  
57  
58  
59  
60

### What is already known on this subject

- Deep rectovaginal endometriosis is common, causing serious morbidity from chronic pelvic pain, subfertility, sexual dysfunction, bowel and urinary dysfunction as well as utilising health care and wider societal resources.
- Laparoscopic surgical excision is increasingly used to treat severe rectovaginal endometriosis in the absence of safe and effective medical therapy, but it requires advanced surgical skills due to its complexity and potential for serious complications.
- There is no consensus on the effectiveness and risks of laparoscopic surgical excision of rectovaginal endometriosis because evidence from large, multi-centre series with clearly defined populations are lacking.

### What this paper adds

- Laparoscopic surgical excision of rectovaginal endometriosis appears to be effective in treating chronic pelvic pain, sexual dysfunction, bowel and urinary symptoms and improving health related quality of life and has a low major complication rate when performed in specialist surgical centres.
- Women with severe and refractory symptoms adversely impacting on their quality of life should be offered laparoscopic surgical treatment in recognised endometriosis centres where clinical outcomes are audited.
- Future studies should randomise between laparoscopic surgery and non-surgical therapy incorporating health economic analyses and compare different laparoscopic surgical interventions for treating rectovaginal endometriosis.

**Copyright statement**

The Corresponding Author has the right to grant on behalf of all authors and does grant on behalf of all authors, a worldwide licence to the Publishers and its licensees in perpetuity, in all forms, formats and media (whether known now or created in the future), to i) publish, reproduce, distribute, display and store the Contribution, ii) translate the Contribution into other languages, create adaptations, reprints, include within collections and create summaries, extracts and/or, abstracts of the Contribution, iii) create any other derivative work(s) based on the Contribution, iv) to exploit all subsidiary rights in the Contribution, v) the inclusion of electronic links from the Contribution to third party material where-ever it may be located; and, vi) licence any third party to do any or all of the above.

**Competing interests:**

All authors have completed the ICMJE uniform disclosure form at [www.icmje.org/coi\\_disclosure.pdf](http://www.icmje.org/coi_disclosure.pdf) and declare: support from the British Society for Gynaecological Endoscopy (BSGE) for the submitted work; no financial relationships with any organisations that might have an interest in the submitted work in the previous three years; no other relationships or activities that could appear to have influenced the submitted work. All authors with the exception of TC are members of the BSGE.

**Contributorship statement**

The contributorship of the authors is as follows: Mr Dominic Byrne maintained and upgraded the endometriosis database, designed the study and analysis, provided data, contributed to data interpretation and drafting of the manuscript. Dr Tamara Curnow - conducted the statistical analysis, data interpretation and contributed to drafting of the manuscript. Mr Paul Smith

1  
2  
3 designed the study, conducted literature and reference review and contributed to drafting of  
4 the manuscript. Mr Ertan Saridogan – provided data, contributed to data interpretation and  
5 drafting of the manuscript. Mr Alfred Cutner – Responsible for set up of the BSGE endometriosis  
6 centres project, provided data, contributed to data interpretation and drafting of the  
7 manuscript. Professor T. Justin Clark – chaired the BSGE Endometriosis Centres Scientific  
8 Advisory Group, designed the study, contributed to data interpretation and drafting of the  
9 manuscript and is the Guarantor on behalf of the BSGE Endometriosis centres research group  
10  
11  
12  
13  
14  
15  
16  
17  
18  
19  
20  
21

#### 22 **Ethics:**

23  
24 All patients gave written consent to have their data stored on the BSGE database and for its  
25 subsequent use in scientific research and publication. Written consent was obtained each time  
26 symptoms and quality of life data were collected. The database is managed in accordance with  
27 the data protection act, data are encrypted and the database is hosted by a third party that is  
28 paid by the BSGE for this service. The BSGE designed and developed the database. The BSGE is  
29 a charity which raises funds from its membership and scientific meeting sponsorship. All  
30 hospitals where clinicians enter data are informed in writing by the BSGE to the CEO and  
31 Medical Director about the patient data storage on the BSGE endometriosis database to ensure  
32 their agreement. Two authors were funded to carry out initial research (PS) and to perform  
33 statistical analysis on the data (TC).  
34  
35  
36  
37  
38  
39  
40  
41  
42  
43  
44  
45  
46  
47  
48  
49

#### 50 **STROBE checklist:**

51  
52 The checklist has been attached and uploaded as a supplemental file to the submitted paper.  
53  
54 We have paid particular attention to items which ask authors to "explain the scientific  
55  
56  
57  
58  
59  
60

1  
2  
3 background and rationale for the investigation being reported" and "state specific objectives,  
4  
5 including any prespecified hypotheses."  
6  
7  
8  
9

10 **Study funding:**

11 The BSGE is a registered charity and paid for the development and maintenance of the  
12 Endometriosis database. The BSGE provided limited funding for one author to perform  
13 background research and literature review (PS) and one author (TC) to undertake statistical  
14 analysis  
15  
16  
17  
18  
19  
20  
21  
22

23 **Study sponsor / funder role:**

24 Each hospital that contributed data acted as a study sponsor in that they agreed to collection of  
25 data from their respective endometriosis centre and it being stored on the BSGE endometriosis  
26 database for research.  
27  
28  
29  
30  
31  
32

33 **Statement of the independence of researchers from funders:**

34 There was no direct research funding apart from the BSGE financial support to set up and  
35 administer the database, employ a statistician and a research fellow  
36  
37  
38  
39  
40  
41  
42

43 **Authors statement:**

44 We confirm that all authors had full access to all of the data (including statistical reports and  
45 tables) in the study and can take responsibility for the integrity of the data and the accuracy of  
46 the data analysis.  
47  
48  
49  
50  
51  
52

53 **Transparency declaration:**

1  
2  
3 I, T Justin Clark, on behalf of all other named authors affirms that the manuscript is an honest,  
4 accurate, and transparent account of the study being reported; that no important aspects of the  
5 study have been omitted; and that any discrepancies from the study as planned have been  
6 explained.  
7  
8  
9

10  
11  
12  
13  
14 **Data sharing statement:**

15  
16 The full dataset is available from the corresponding author at t.j.clark@doctors.org.uk  
17  
18

19  
20  
21 **Study registration number and name of register for any study type:**

22  
23 Not registered. The BSGE website describes the endometriosis centres project and the  
24 establishment of the endometriosis patient registry (endometriosis database) which meets the  
25 standards set by NICE for such records.  
26  
27  
28  
29  
30  
31  
32  
33  
34  
35  
36  
37  
38  
39  
40  
41  
42  
43  
44  
45  
46  
47  
48  
49  
50  
51  
52  
53  
54  
55  
56  
57  
58  
59  
60



## Aknowledgements

We are grateful to Jeremy Wright and Adam Moors who designed and established the BSGE endometriosis database and Dominic Byrne who upgraded it to increase completeness of data collection and follow up.

We are grateful to the BSGE Scientific Advisory Group who approve research on BSGE endometriosis database data and have scrutinised the manuscript. The members are: Prof Justin Clark (chair), Dominic Byrne, Oliver Chappatte, Alfred Cutner, Chris Guyer, Ertan Saridogan and Robert Richardson.

We would like to thank and acknowledge all the BSGE Endocentre teams for contributing to this work by entering their data on the BSGE Endometriosis database, they are listed alphabetically below with number of cases in brackets and name of lead Gynaecologist. The seven centres referred to in the paper with best follow up are marked in bold.

Aberdeen (99) Lucky Saraswat, **ACEMIG (140) Shaheen Khazali**, Altnergavin (36) Iris Menninger, Birmingham (58) Yousri Afifi, Castle Hill (103) Kevin Phillips, CEMIG (199) Saikat Banerjee, Chelsea and Westminster (258) Robert Richardson, Chester (88) Jeremy Hawe, Colchester (81) Barry Whitlow, **Cornwall (257) Dominic Byrne**, Croydon University hospital (57) Emmanuel Ofuasia Dewsbury/Elland (121) Ashwini Trehan, Dorset (57) Tyrone Carpenter, Endometriosis CaRe Oxford (164) Christian Becker, Exeter (23) James Clark, Expett Edinburgh (52) Stuart Jack, **Guy's and Thomas' (29) Kumar Kunde** Gynaecology.co (98) Alfred Cutner, Homerton (21) Chris Barnick, Imperial (75) Alan Farthing, James Cook Hospital (111) Graham Phillips, Kings College (132) John Bidmead, Lancashire women's and newborn (31) Mohamed Abdel-Aty, Liverpool women's (85) George Botros, Luton and Dunstable (35) Marlin Mubarak, , Mid Yorks (46) Christian Kremer, Norfolk and Norwich University Hospital (53) Edward Morris, North Middlesex (34) Stanley Okolo, **North west pelvic pain, Manchester (87) Edmond Edi-Osagi**, Northwick Park Hospital (81) Kamel Shehata-Iskander, Penine (63) Gaity Ahmad, Plymouth (53) Jonathan Frappell, **Preston Royal, Lancashire (31)**

1  
2  
3 **Brice Rodriguez**, , Queens University Hospital, Romford (27) Yemi Coker, Royal London (55) Elizabeth  
4 Ball, Royal Stoke (69) Gourab Misra, Southampton (160) Adam Moors, , Southmead(104) Sanjay  
5 Vyas, St Georges (46) Thomas Ind, St Mary's, Portsmouth (143) Chris Guyer, **St Michaels Hospital,**  
6  
7 **Bristol (81) Caroline Overton**, Stockport (60) Suku George, The northern endometriosis team (49)  
8  
9 Tony Chalhoub, Tunbridge Wells (146) Oliver Chappatte, University College London Hospital (302)  
10  
11 Ertan Saridogan, University Hospital of Wales (80) Richard Penketh, UPMC Beacon (32) Moiad  
12  
13 Alazzam, Whipps Cross Hospital (82) Funlayo Odejinmi, Winchester (21) Keith Louden, Wirral  
14  
15 University Teaching Hospital (324) David Rowlands, **Worcestershire (82) Jon Hughes.**  
16  
17  
18  
19  
20  
21  
22  
23  
24  
25  
26  
27  
28  
29  
30  
31  
32  
33  
34  
35  
36  
37  
38  
39  
40  
41  
42  
43  
44  
45  
46  
47  
48  
49  
50  
51  
52  
53  
54  
55  
56  
57  
58  
59  
60

## References

1. Dunselman G a. J, Vermeulen N, Becker C, Calhaz-Jorge C, Hooghe T D', De Bie B, et al. ESHRE guideline: management of women with endometriosis. *Hum Reprod Oxf Engl*. 2014 Mar;29(3):400–12.
2. Koninckx PR, Martin DC. Deep endometriosis: a consequence of infiltration or retraction or possibly adenomyosis externa? *Fertil Steril*. 1992 Nov;58(5):924–8.
3. Vercellini P, Crosignani PG, Somigliana E, Berlanda N, Barbara G, Fedele L. Medical treatment for rectovaginal endometriosis: what is the evidence? *Hum Reprod Oxf Engl*. 2009 Oct;24(10):2504–14.
4. Fedele L, Bianchi S, Zanconato G, Tozzi L, Raffaelli R. Gonadotropin-releasing hormone agonist treatment for endometriosis of the rectovaginal septum. *Am J Obstet Gynecol*. 2000 Dec;183(6):1462–7.
5. Busacca M, Somigliana E, Bianchi S, De Marinis S, Calia C, Candiani M, et al. Post-operative GnRH analogue treatment after conservative surgery for symptomatic endometriosis stage III-IV: a randomized controlled trial. *Hum Reprod Oxf Engl*. 2001 Nov;16(11):2399–402.
6. Jerby BL, Kessler H, Falcone T, Milsom JW. Laparoscopic management of colorectal endometriosis. *Surg Endosc*. 1999 Nov;13(11):1125–8.
7. Redwine DB. Laparoscopic en bloc resection for treatment of the obliterated cul-de-sac in endometriosis. *J Reprod Med*. 1992 Aug;37(8):695–8.
8. Emmanuel KR, Davis C. Outcomes and treatment options in rectovaginal endometriosis. *Curr Opin Obstet Gynecol*. 2005 Aug;17(4):399–402.
9. De Cicco C, Corona R, Schonman R, Mailova K, Ussia A, Koninckx P. Bowel resection for deep endometriosis: a systematic review. *BJOG Int J Obstet Gynaecol*. 2011 Feb;118(3):285–91.
10. Meuleman C, Tomassetti C, Hoore A D', Van Cleynenbreugel B, Penninckx F, Vergote I, et al. Surgical treatment of deeply infiltrating endometriosis with colorectal involvement. *Hum Reprod Update*. 2011 Jun;17(3):311–26.
11. Kent A, Shakir F, Rockall T, Haines P, Pearson C, Rae-Mitchell W, et al. Laparoscopic Surgery for Severe Rectovaginal Endometriosis Compromising the Bowel: A Prospective Cohort Study. *J Minim Invasive Gynecol*. 2016 Jun;23(4):526–34.

12. Saridogan E, Byrne D. The British society for gynaecological endoscopy endometriosis centres project. *Gynecol Obstet Invest*. 2013;76(1):10–3.
13. Adamson GD. The modern role of reproductive surgery. *Clin Obstet Gynecol*. 2011;54(4):710–9.
14. Adamson GD, Pasta DJ. Endometriosis fertility index: the new, validated endometriosis staging system. *Fertil Steril*. 2010 Oct;94(5):1609–15.
15. Tuttlies F, Keckstein J, Ulrich U, Possover M, Schweppe KW, Wustlich M, et al. [ENZIAN-score, a classification of deep infiltrating endometriosis]. *Zentralbl Gynakol*. 2005 Oct;127(5):275–81.
16. Revised American Society for Reproductive Medicine classification of endometriosis: 1996. *Fertil Steril*. 1997 May;67(5):817–21.
17. EuroQol Group. EuroQol--a new facility for the measurement of health-related quality of life. *Health Policy Amst Neth*. 1990 Dec;16(3):199–208.
18. Rabin R, de Charro F. EQ-5D: a measure of health status from the EuroQol Group. *Ann Med*. 2001 Jul;33(5):337–43.
19. Dolan, Gudex, Kind and Williams, A Social tariff for Euroqol: Results from a UK General Population Survey. Discussion paper 138. York: Univerity of York, 1995.
20. Setälä M, Härkki P, Matomäki J, Mäkinen J, Kössi J. Sexual functioning, quality of life and pelvic pain 12 months after endometriosis surgery including vaginal resection. *Acta Obstet Gynecol Scand*. 2012 Jun;91(6):692–8.
21. Garry R, Clayton R, Hawe J. The effect of endometriosis and its radical laparoscopic excision on quality of life indicators. *BJOG Int J Obstet Gynaecol*. 2000 Jan;107(1):44–54.
22. Mabrouk M, Montanari G, Guerrini M, Villa G, Solfrini S, Vicenzi C, et al. Does laparoscopic management of deep infiltrating endometriosis improve quality of life? A prospective study. *Health Qual Life Outcomes*. 2011;9:98.
23. Soliman AM, Yang H, Du EX, Kelley C, Winkel C. The direct and indirect costs associated with endometriosis: a systematic literature review. *Hum Reprod Oxf Engl*. 2016 Apr;31(4):712–22.

- 1  
2  
3 24. Dubernard G, Piketty M, Rouzier R, Houry S, Bazot M, Darai E. Quality of life after  
4 laparoscopic colorectal resection for endometriosis. *Hum Reprod Oxf Engl*. 2006  
5 May;21(5):1243–7.  
6  
7  
8 25. Redwine DB, Wright JT. Laparoscopic treatment of complete obliteration of the cul-de-  
9 sac associated with endometriosis: long-term follow-up of en bloc resection. *Fertil*  
10 *Steril*. 2001 Aug;76(2):358–65.  
11  
12 26. Dubernard G, Rouzier R, David-Montefiore E, Bazot M, Darai E. Use of the SF-36  
13 questionnaire to predict quality-of-life improvement after laparoscopic colorectal  
14 resection for endometriosis. *Hum Reprod Oxf Engl*. 2008 Apr;23(4):846–51.  
15  
16  
17  
18  
19  
20  
21  
22  
23  
24  
25  
26  
27  
28  
29  
30  
31  
32  
33  
34  
35  
36  
37  
38  
39  
40  
41  
42  
43  
44  
45  
46  
47  
48  
49  
50  
51  
52  
53  
54  
55  
56  
57  
58  
59  
60

**Table 1.** Patient reported symptoms prior to laparoscopic surgical excision of rectovaginal endometriosis and at six months, one year and two years post treatment (median scores are presented (0-10 for the first nine symptoms and 0-4 for the remaining 5 symptoms) with total number of responses in round brackets and 95% confidence interval of the median in square brackets). A lower score is associated with less severe symptoms.

| Pre menstrual pain                 | Pre-surgery    | 6 months       | 12 months      | 24 months     | Short – term <sup>1</sup><br>(baseline vs. 6 months) | Long – term <sup>1</sup><br>(baseline vs. 24 months) | Change <sup>2</sup><br>(6 months vs. 24 months) |
|------------------------------------|----------------|----------------|----------------|---------------|------------------------------------------------------|------------------------------------------------------|-------------------------------------------------|
| Premenstrual pain*                 | 7 [7 7] (3853) | 3 [3 3] (1817) | 3 [3 4] (1120) | 3 [3 4] (531) | 0.000v (1785)                                        | 0.000v (527)                                         | 0.000^ (358)                                    |
| Menstrual pain*                    | 9 [9 9] (3857) | 5 [4 5] (1810) | 5 [4 5] (1116) | 5 [4 6] (524) | 0.000v (1781)                                        | 0.000v (522)                                         | 0.004^ (354)                                    |
| Noncyclical pelvic pain            | 6 [6 6] (4155) | 2 [2 2] (2170) | 2 [2 2] (1360) | 3 [2 3] (658) | 0.000v (2160)                                        | 0.000v (656)                                         | 0.000^ (453)                                    |
| Deep dyspareunia                   | 6 [5 6] (3987) | 1 [0 1] (1998) | 1 [1 1] (1247) | 2 [1 2] (608) | 0.000v (1952)                                        | 0.000v (598)                                         | 0.000^ (403)                                    |
| Cyclical dyschezia*                | 6 [6 6] (3852) | 1 [0 1] (1834) | 1 [0 1] (1157) | 2 [1 3] (536) | 0.000v (1799)                                        | 0.000v (535)                                         | 0.000^ (359)                                    |
| Non cyclical dyschezia             | 3 [2 3] (4136) | 0 [0 0] (2178) | 0 [0 0] (1374) | 0 [0 1] (655) | 0.000v (2162)                                        | 0.000v (646)                                         | 0.000^ (449)                                    |
| Lower back pain                    | 6 [6 6] (4151) | 3 [3 3] (2188) | 3 [3 3] (1376) | 3 [3 4] (660) | 0.000v (2172)                                        | 0.000v (656)                                         | 0.027^ (457)                                    |
| Bladder pain or pain passing urine | 0 [0 0] (4085) | 0 [0 0] (2162) | 0 [0 0] (1369) | 0 [0 0] (652) | 0.000v (2122)                                        | 0.000v (638)                                         | 0.034^ (446)                                    |
| Difficulty emptying bladder        | 0 [0 0] (4003) | 0 [0 0] (2135) | 0 [0 0] (1360) | 0 [0 0] (650) | 0.000v (2075)                                        | 0.105 (628)                                          | 0.002^ (440)                                    |
| Frequent bowel movements           | 2 [2 2] (3996) | 2 [2 2] (2154) | 2 [2 2] (1372) | 2 [2 2] (660) | 0.000v (2087)                                        | 0.012v (626)                                         | 0.051 (451)                                     |
| Urgent bowel movements             | 1 [1 1] (3997) | 1 [1 1] (2154) | 1 [1 1] (1371) | 1 [1 1] (658) | 0.000v (2091)                                        | 0.006v (623)                                         | 0.000^ (449)                                    |
| Incomplete emptying sensation      | 1 [1 1] (3981) | 1 [1 1] (2149) | 1 [1 1] (1372) | 1 [1 1] (659) | 0.000v (2075)                                        | 0.000v (623)                                         | 0.004^ (447)                                    |
| Constipation                       | 2 [1 2] (4001) | 1 [1 1] (2156) | 1 [1 1] (1368) | 1 [1 1] (658) | 0.000v (2091)                                        | 0.002v (628)                                         | 0.001^ (449)                                    |
| Blood in the stool                 | 0 [0 0] (3894) | 0 [0 0] (1912) | 0 [0 0] (1206) | 0 [0 0] (546) | 0.000v (1831)                                        | 0.038v (507)                                         | 0.001^ (350)                                    |

<sup>1</sup> Statistical comparison (Mann Whitney U test) of short term symptom scores (6 months post surgery) and long term symptom scores (2 years post surgery) with baseline scores (pre-surgery)

<sup>2</sup> Statistical comparison (Mann Whitney U test) of change in symptom scores over time post treatment (between 6 months and 2 years)

^ = statistically significant increase, v = statistically significant decrease.

Note that there is some variation in total number of responses depending on whether patients chose not to answer some questions

\* Excludes patients that had a hysterectomy prior to this surgery.

**Table 2.** Median scores for patient reported quality of life prior to treatment and at six months, one year and two years post treatment with total number of patients in round brackets and 95% confidence intervals in square brackets. Median EQVAS lies in the range 0-100 with a higher score associated with a better quality of life. The other median scores (EQ5D) lie in the range 0-2 where a lower score is associated with a better quality of life.

| Pre menstrual pain         | Pre-surgery                   | 6 months                      | 12 months                     | 24 months                    | Short – term <sup>2</sup><br>(baseline vs. 6 months) | Long – term <sup>2</sup><br>(baseline vs. 24 months) | Change <sup>3</sup><br>(6 months vs. 24 months) |
|----------------------------|-------------------------------|-------------------------------|-------------------------------|------------------------------|------------------------------------------------------|------------------------------------------------------|-------------------------------------------------|
| EQVAS numeric <sup>1</sup> | 55 [55 57]<br>(4015)          | 80 [75 80]<br>(2050)          | 80 [75 80]<br>(1247)          | 76 [75 80]<br>(575)          | 0.000 <sup>^</sup> (2045)                            | 0.000 <sup>^</sup> (573)                             | 0.024 <sup>v</sup> (396)                        |
| EQ5D Usual Activities      | 1 [1 1] (4005)                | 0 [0 0] (2051)                | 0 [0 0] (1250)                | 0 [0 0] (574)                | 0.000 <sup>v</sup> (2042)                            | 0.000 <sup>v</sup> (570)                             | 0.477 (395)                                     |
| EQ5D Pain discomfort       | 1 [1 1] (4004)                | 1 [1 1] (2050)                | 1 [1 1] (1252)                | 1 [1 1] (573)                | 0.000 <sup>v</sup> (2041)                            | 0.000 <sup>v</sup> (569)                             | 0.427 (394)                                     |
| EQ5D Anxiety depression    | 1 [1 1] (3991)                | 0 [0 0] (2049)                | 0 [0 0] (1252)                | 0 [0 0] (573)                | 0.000 <sup>v</sup> (2033)                            | 0.000 <sup>v</sup> (569)                             | 0.331 (395)                                     |
| EQ5D Mobility              | 0 [0 0] (3999)                | 0 [0 0] (2046)                | 0 [0 0] (1250)                | 0 [0 0] (569)                | 0.000 <sup>v</sup> (2035)                            | 0.000 <sup>v</sup> (563)                             | 0.339 (392)                                     |
| EQ5D SelfCare              | 0 [0 0] (3994)                | 0 [0 0] (2033)                | 0 [0 0] (1248)                | 0 [0 0] (558)                | 0.000 <sup>v</sup> (2020)                            | 0.001 <sup>v</sup> (548)                             | 0.364 (384)                                     |
| EQ5D index <sup>1*</sup>   | 0.689 [0.689<br>0.689] (3966) | 0.796 [0.796<br>0.796] (2032) | 0.796 [0.796<br>0.796] (1245) | 0.796 [0.796<br>0.796] (556) | 0.000 <sup>^</sup> (2010)                            | 0.000 <sup>^</sup> (546)                             | 0.043 <sup>v</sup> (383)                        |

<sup>1</sup>A high Euroqol Visual Analogue Scale (EQ-VAS) score or a high EQ5D index score is associated with an improvement in QoL whereas with all other QoL and symptom scores a low value is associated with improvement.

<sup>2</sup>Statistical comparison (Mann Whitney U test ) of short term symptom scores (6 months post surgery) and long term symptom scores (2 years post surgery) with baseline scores (pre-surgery)

<sup>3</sup>Statistical comparison (Mann Whitney U test ) of change in symptom scores over time post treatment (between 6 months and 2 years)

<sup>^</sup> = statistically significant increase, <sup>v</sup> = statistically significant decrease

Note that there is some variation in total number of responses depending on whether patients chose not to answer some questions.

\* EQ5D index of 1 is equivalent to perfect health and 0 equivalent to death. Means are reported rather than medians..

**Table 3.** Analgesia use prior to surgery and at six months, one year and two years post surgery. Percentage of patients using medication with total number of patients in brackets.

| Pre menstrual pain | Pre-surgery  | 6 months     | 12 months    | 24 months   | Short – term <sup>1</sup><br>(baseline vs. 6 months) | Long – term <sup>1</sup><br>(baseline vs. 24 months) | Change <sup>2</sup><br>(6 months vs. 24 months) |
|--------------------|--------------|--------------|--------------|-------------|------------------------------------------------------|------------------------------------------------------|-------------------------------------------------|
| Paracetamol        | 76.0% (4118) | 59.8%(1934)  | 60.6% (1235) | 61.4% (610) | 0.000v (1915)                                        | 0.000v (604)                                         | 0.001^ (388)                                    |
| NSAID              | 69.8% (4099) | 48.9%(1924)  | 48.3% (1229) | 52.0% (603) | 0.000v (1903)                                        | 0.000v (593)                                         | 0.013^ (385)                                    |
| Opiates            | 28.1% (3953) | 16.1% (1895) | 16.8% (1214) | 16.6% (592) | 0.000v (1859)                                        | 0.000v (575)                                         | 0.006^ (376)                                    |

NSAID – non-steroidal anti-inflammatory drug

<sup>1</sup> Statistical comparisons of short term change in analgesia use(6 months post surgery) and long term change in analgesia use (2 years post surgery) with baseline analgesia use (pre-surgery) assessed using a 2-tailed sign test.

<sup>2</sup> Statistical comparison of change in analgesia use over time post treatment (between 6 months and 2 years) using a 2-tailed sign-test.

^ = statistically significant increase, v = statistically significant decrease.

Note that there is some variation in total number of responses depending on whether patients chose not to answer some questions



**Table 4.** Sensitivity analysis for missing post-operative data.

|                                         | Short-term<br>(6 months) <sup>1</sup> | Long-term<br>(2 years) <sup>1</sup> | Range       |
|-----------------------------------------|---------------------------------------|-------------------------------------|-------------|
| <i>Symptoms</i>                         |                                       |                                     |             |
| Premenstrual pain                       | 9                                     | 8                                   | [0, 10]     |
| Menstrual pain                          | 10                                    | 10                                  | [0, 10]     |
| Non cyclical pelvic pain                | 7                                     | 6                                   | [0, 10]     |
| Deep dyspareunia                        | 8                                     | 6                                   | [0, 10]     |
| Cyclical dyschezia                      | 7                                     | 7                                   | [0, 10]     |
| Non cyclical dyschezia                  | 5                                     | 3                                   | [0, 10]     |
| Low back pain                           | 7                                     | 7                                   | [0, 10]     |
| Bladder pain                            | 2                                     | 1                                   | [0, 10]     |
| Voiding difficulty                      | 0                                     | NS                                  | [0, 10]     |
| Frequent bowel movements <sup>2</sup>   | 3                                     | 3                                   | [0, 4]      |
| Urgent bowel movements <sup>2</sup>     | 2                                     | 2                                   | [0, 4]      |
| Incomplete bowel movements <sup>2</sup> | 2                                     | 2                                   | [0, 4]      |
| Constipation <sup>2</sup>               | 2                                     | 2                                   | [0, 4]      |
| Blood in the stool <sup>2</sup>         | 0                                     | 1                                   | [0, 4]      |
| <i>Quality of life<sup>2</sup></i>      |                                       |                                     |             |
| EQ Visual analogue score                | 40                                    | 55                                  | [0, 100]    |
| EQ5D Usual Activities                   | 2                                     | 1                                   | [0, 2]      |
| EQ5D Pain and discomfort                | 2                                     | 2                                   | [0, 2]      |
| EQ5D Anxiety and depression             | 1                                     | 1                                   | [0, 2]      |
| EQ5D Mobility                           | 1                                     | 1                                   | [0, 2]      |
| EQ5D Self care                          | 1                                     | 1                                   | [0, 2]      |
| EQ5D index                              | 0.45                                  | 0.65                                | [-0.594, 1] |

<sup>1</sup> The worst possible score that could be reported for all the missing post-operative data in order for the short-term (six months) or long-term statistics in Tables 3 & 4 to still be significant (The test statistics that were not significant (NS) to start with have not been included).

<sup>2</sup> A high EuroQol Visual Analogue Scale (EQ-VAS) or EQ5D index score is associated with an improvement in QoL whereas with all other QoL and symptom scores a low value is associated with improvement.

**Table 5.** Sensitivity analysis for missing post-operative data restricted to the seven British Society for Gynaecological Endoscopy (BSGE) Endometriosis Centres with the most complete follow-up.

|                                         | Short-term (6 months) <sup>1</sup> | Long-term (2 years) <sup>1</sup> | Range       |
|-----------------------------------------|------------------------------------|----------------------------------|-------------|
| <i>Symptoms</i>                         |                                    |                                  |             |
| Premenstrual pain                       | 10                                 | 7                                | [0, 10]     |
| Menstrual pain                          | 10                                 | 9                                | [0, 10]     |
| Non cyclical pelvic pain                | 10                                 | 5                                | [0, 10]     |
| Deep dyspareunia                        | 10                                 | 5                                | [0, 10]     |
| Cyclical dyschezia                      | 10                                 | 5                                | [0, 10]     |
| Non cyclical dyschezia                  | 7                                  | 4                                | [0, 10]     |
| Low back pain                           | 10                                 | 5                                | [0, 10]     |
| Bladder pain                            | 4                                  | 1                                | [0, 10]     |
| Voiding difficulty                      | 1                                  | NS                               | [0, 10]     |
| Frequent bowel movements <sup>2</sup>   | 2                                  | NS                               | [0, 4]      |
| Urgent bowel movements <sup>2</sup>     | 3                                  | NS                               | [0, 4]      |
| Incomplete bowel movements <sup>2</sup> | 2                                  | NS                               | [0, 4]      |
| Constipation <sup>2</sup>               | 2                                  | NS                               | [0, 4]      |
| Blood in the stool <sup>2</sup>         | 2                                  | 1                                | [0, 4]      |
| <i>Quality of life<sup>2</sup></i>      |                                    |                                  |             |
| EQ Visual analogue score                | 0                                  | 55                               | [0, 100]    |
| EQ5D Usual Activities                   | 1                                  | 1                                | [0, 2]      |
| EQ5D Pain and discomfort                | 2                                  | 2                                | [0, 2]      |
| EQ5D Anxiety and depression             | 2                                  | 1                                | [0, 2]      |
| EQ5D Mobility                           | 0                                  | 1                                | [0, 2]      |
| EQ5D Self care                          | 1                                  | NS                               | [0, 2]      |
| EQ5D index                              | -0.594                             | 0.65                             | [-0.594, 1] |

<sup>1</sup> The worst possible score that could be reported for all the missing post-operative data in order for the short-term (six months) or long-term statistics in Tables 3 & 4 to still be significant (The test statistics that were not significant (NS) to start with have not been included).

<sup>2</sup> A high EuroQol Visual Analogue Scale (EQ-VAS) or EQ5D index score is associated with an improvement in QoL whereas with all other QoL and symptom scores a low value is associated with improvement.

**Table 6.** Incidence of peri-operative and post-operative complications.

| Peri-operative complication                            | Number of patients | Incidence   |
|--------------------------------------------------------|--------------------|-------------|
| Haemorrhage >1litre                                    | 43                 | 0.9%        |
| Ureteric injury                                        | 24                 | 0.5%        |
| Unexpected bowel injury                                | 28                 | 0.6%        |
| Unexpected bladder injury                              | 17                 | 0.4%        |
| Unexpected vascular injury                             | 10                 | 0.2%        |
| Epigastric injury                                      | 4                  | 0.1%        |
| Conversion to laparotomy                               | 41                 | 0.9%        |
| Colostomy                                              | 9                  | 0.2%        |
| Ileostomy                                              | 14                 | 0.3%        |
| Unplanned Removal of any other organ                   | 11                 | 0.2%        |
| Death                                                  | 0                  | 0.0%        |
| <b>Total suffering any perioperative complication</b>  | <b>220</b>         | <b>4.7%</b> |
| <b>Post-operative complication</b>                     |                    |             |
| Pelvic haematoma                                       | 37                 | 0.8%        |
| Pelvic Abscess                                         | 17                 | 0.4%        |
| Urinary tract leak                                     | 11                 | 0.2%        |
| Bowel leak                                             | 17                 | 0.4%        |
| Urinary tract fistula                                  | 2                  | 0.0%        |
| Bowel fistula                                          | 12                 | 0.3%        |
| Severe sepsis                                          | 10                 | 0.2%        |
| Pulmonary embolism                                     | 1                  | 0.0%        |
| <b>Total suffering any post operative complication</b> | <b>120</b>         | <b>2.5%</b> |

Note that some patients suffered more than one complication

**Table 7.** Incidence of bowel complication related to the type of surgery performed on the bowel.

| Type of bowel surgery | Number of operations | UBI       | Leak      | Fistula   | Total     |
|-----------------------|----------------------|-----------|-----------|-----------|-----------|
| No Bowel Surgery      | 1740                 | 6 (0.3%)  | 3 (0.2%)  | 2 (0.1%)  | 11 (0.6%) |
| Shaved                | 2746                 | 18 (0.7%) | 6 (0.2%)  | 5 (0.2%)  | 29 (1.1%) |
| Disc Resection        | 54                   | 0 (0.0%)  | 4 (7.4%)  | 3 (5.6%)  | 5 (9.3%)  |
| Segmental Resection   | 181                  | 4 (2.2%)  | 4 (2.2%)  | 2 (1.1%)  | 7 (3.9%)  |
| Total                 | 4721                 | 28 (0.6%) | 17 (0.4%) | 12 (0.3%) | 52 (1.1%) |

*UBI = unexpected bowel injury at the time of surgery. Leak = any bowel leak identified after primary surgery. Fistula formation is a late complication from surgery.*

**Supplementary table 1.** Patient reported symptoms prior to laparoscopic surgical excision of rectovaginal endometriosis and at six months, one year and two years post treatment (median scores are presented (0-10 for the first nine symptoms and 0-4 for the remaining 5 symptoms) with total number of patients in round brackets and 95% confidence interval of the median in square brackets). Analysis restricted to the seven British Society for Gynaecological Endoscopy (BSGE) Endometriosis Centres with the most complete follow-up. A lower score is associated with less severe symptoms.

|                                    | Pre-surgery   | 6 months      | 12 months     | 24 months     | Short – term <sup>1</sup><br>(baseline vs. 6 months) | Long – term <sup>1</sup><br>(baseline vs. 24 months) | Change <sup>2</sup><br>(6 months vs. 24 months) |
|------------------------------------|---------------|---------------|---------------|---------------|------------------------------------------------------|------------------------------------------------------|-------------------------------------------------|
| Premenstrual pain*                 | 7 [6 7] (632) | 3 [2 3] (436) | 3 [2 3] (278) | 4 [3 5] (119) | 0.000v (427)                                         | 0.000v (119)                                         | 0.108 (97)                                      |
| Menstrual pain*                    | 9 [8 9] (633) | 4 [3 5] (435) | 4 [4 5] (278) | 6 [5 7] (118) | 0.000v (427)                                         | 0.000v (118)                                         | 0.017^ (96)                                     |
| Noncyclical pelvic pain            | 6 [5 6] (676) | 2 [2 2] (517) | 2 [2 3] (333) | 3 [2 4] (152) | 0.000v (516)                                         | 0.000v (151)                                         | 0.007^ (125)                                    |
| Deep dyspareunia                   | 6 [5 6] (646) | 1 [0 2] (453) | 1 [0 2] (303) | 2 [1 3] (137) | 0.000v (449)                                         | 0.000v (136)                                         | 0.317 (105)                                     |
| Cyclical dyschezia*                | 6 [5 6] (632) | 0 [0 0] (444) | 1 [0 2] (289) | 3 [1 4] (125) | 0.000v (434)                                         | 0.000v (125)                                         | 0.000^ (100)                                    |
| Non cyclical dyschezia             | 3 [2 3] (673) | 0 [0 0] (519) | 0 [0 0] (339) | 0 [0 2] (151) | 0.000v (516)                                         | 0.000v (149)                                         | 0.192 (123)                                     |
| Lower back pain                    | 6 [5 6] (671) | 2 [2 3] (521) | 2 [2 3] (341) | 4 [2 5] (152) | 0.000v (515)                                         | 0.000v (151)                                         | 0.905 (126)                                     |
| Bladder pain or pain passing urine | 0 [0 1] (668) | 0 [0 0] (518) | 0 [0 0] (337) | 0 [0 0] (153) | 0.000v (511)                                         | 0.000v (151)                                         | 0.560 (126)                                     |
| Difficulty emptying bladder        | 0 [0 0] (662) | 0 [0 0] (516) | 0 [0 0] (336) | 0 [0 0] (153) | 0.000v (506)                                         | 0.136 (150)                                          | 0.558 (124)                                     |
| Frequent bowel movements           | 2 [2 2] (665) | 2 [2 2] (521) | 2 [2 2] (340) | 2 [2 3] (151) | 0.000v (513)                                         | 0.343 (146)                                          | 0.096 (125)                                     |
| Urgent bowel movements             | 1 [1 1] (665) | 1 [1 1] (521) | 1 [0 1] (339) | 1 [1 2] (150) | 0.000v (513)                                         | 0.524 (145)                                          | 0.000^ (124)                                    |
| Incomplete emptying sensation      | 1 [1 2] (662) | 1 [1 1] (519) | 1 [0 1] (340) | 1 [1 2] (153) | 0.000v (509)                                         | 0.426 (147)                                          | 0.001^ (126)                                    |
| Constipation                       | 1 [1 2] (664) | 1 [1 1] (521) | 1 [1 1] (340) | 1 [1 1] (151) | 0.000v (512)                                         | 0.093 (146)                                          | 0.024^ (125)                                    |
| Blood in the stool                 | 0 [0 0] (641) | 0 [0 0] (450) | 0 [0 0] (294) | 0 [0 0] (125) | 0.000v (439)                                         | 0.019v (118)                                         | 0.074 (98)                                      |

<sup>1</sup> Statistical comparison (Mann Whitney U test) of short term symptom scores (6 months post surgery) and long term symptom scores (2 years post surgery) with baseline scores (pre-surgery)

<sup>2</sup> Statistical comparison (Mann Whitney U test) of change in symptom scores over time post treatment (between 6 months and 2 years)

^ = statistically significant increase, v = statistically significant decrease.

Note that there is some variation in total number of responses depending on whether patients chose not to answer some questions

\* Excludes patients that had a hysterectomy prior to this surgery.

**Supplementary table 2.** Median scores for patient reported quality of life prior to treatment and at six months, one year and two years post treatment with total number of patients in round brackets and 95% confidence intervals in square brackets restricted to the seven British Society for Gynaecological Endoscopy (BSGE) Endometriosis Centres with the most complete follow-up. Median EQVAS lies in the range 0-100 with a higher score associated with a better quality of life. Mean EQ5D index is 1 for perfect health and 0 for death with possible negative values associated with 'worse than death'. The other median scores (EQ5D) lie in the range 0-2 where a lower score is associated with a better quality of life.

|                            | Pre-surgery                  | 6 months                     | 12 months                    | 24 months                    | Short – term <sup>2</sup><br>(baseline vs. 6 months) | Long – term <sup>2</sup><br>(baseline vs. 24 months) | Change <sup>3</sup><br>(6 months vs. 24 months) |
|----------------------------|------------------------------|------------------------------|------------------------------|------------------------------|------------------------------------------------------|------------------------------------------------------|-------------------------------------------------|
| EQVAS numeric <sup>1</sup> | 55 [50 60]<br>(664)          | 80 [80 80]<br>(510)          | 80 [75 80]<br>(328)          | 75 [70 80]<br>(136)          | 0.000 <sup>^</sup> (508)                             | 0.000 <sup>^</sup> (136)                             | 0.036 <sup>v</sup> (116)                        |
| EQ5D Usual Activities      | 1 [1 1] (666)                | 0 [0 0] (510)                | 0 [0 0] (330)                | 0 [0 1] (135)                | 0.000 <sup>v</sup> (510)                             | 0.000 <sup>v</sup> (135)                             | 0.140 (116)                                     |
| EQ5D Pain discomfort       | 1 [1 1] (667)                | 1 [0 1] (510)                | 1 [0 1] (332)                | 1 [1 1] (135)                | 0.000 <sup>v</sup> (510)                             | 0.000 <sup>v</sup> (135)                             | 0.025 <sup>^</sup> (116)                        |
| EQ5D Anxiety depression    | 1 [1 1] (663)                | 0 [0 0] (510)                | 0 [0 0] (332)                | 0 [0 0] (134)                | 0.000 <sup>v</sup> (507)                             | 0.000 <sup>v</sup> (134)                             | 0.490 (116)                                     |
| EQ5D Mobility              | 0 [0 0] (667)                | 0 [0 0] (510)                | 0 [0 0] (332)                | 0 [0 0] (134)                | 0.000 <sup>v</sup> (510)                             | 0.000 <sup>v</sup> (134)                             | 0.034 <sup>^</sup> (116)                        |
| EQ5D SelfCare              | 0 [0 0] (666)                | 0 [0 0] (509)                | 0 [0 0] (332)                | 0 [0 0] (135)                | 0.000 <sup>v</sup> (508)                             | 0.134 (135)                                          | 0.453 (116)                                     |
| EQ5D index <sup>1*</sup>   | 0.673 [0.620<br>0.689] (662) | 0.796 [0.796<br>0.812] (509) | 0.796 [0.796<br>0.848] (330) | 0.796 [0.743<br>0.796] (134) | 0.000 <sup>^</sup> (506)                             | 0.000 <sup>^</sup> (134)                             | 0.008 <sup>v</sup> (116)                        |

<sup>1</sup>A high Euroqol Visual Analogue Scale (EQ-VAS) score or a high EQ5D index score is associated with an improvement in QoL whereas with all other QoL and symptom scores a low value is associated with improvement.

<sup>2</sup>Statistical comparison (Mann Whitney U test ) of short term symptom scores (6 months post surgery) and long term symptom scores (2 years post surgery) with baseline scores (pre-surgery)

<sup>3</sup>Statistical comparison (Mann Whitney U test ) of change in symptom scores over time post treatment (between 6 months and 2 years)

<sup>^</sup> = statistically significant increase, <sup>v</sup> = statistically significant decrease.

Note that there is some variation in total number of responses depending on whether patients chose not to answer some questions.

\* EQ5D index of 1 is equivalent to perfect health and 0 equivalent to death. Means are reported rather than medians..

1  
2  
3  
4  
5  
6  
7  
8  
9  
10  
11  
12  
13  
14  
15  
16  
17  
18  
19  
20  
21  
22  
23  
24  
25  
26  
27  
28  
29  
30  
31  
32  
33  
34  
35  
36  
37  
38  
39  
40  
41  
42  
43  
44  
45  
46

For peer review only

**Supplementary table 3.** Analgesia use prior to surgery and at six months, one year and two years post surgery restricted to the seven British Society for Gynaecological Endoscopy (BSGE) Endometriosis Centres with the most complete follow-up. Percentage of patients using medication with total number of patients in brackets.

|             | <b>Pre-surgery</b> | <b>6 months</b> | <b>12 months</b> | <b>24 months</b> | <b>Short – term<sup>1</sup><br/>(baseline vs. 6 months)</b> | <b>Long – term<sup>1</sup><br/>(baseline vs. 24 months)</b> | <b>Change<sup>2</sup><br/>(6 months vs. 24 months)</b> |
|-------------|--------------------|-----------------|------------------|------------------|-------------------------------------------------------------|-------------------------------------------------------------|--------------------------------------------------------|
| Paracetamol | 68.3% (672)        | 51.1% (464)     | 50.3% (302)      | 56.3% (144)      | 0.000v (461)                                                | 0.002v (142)                                                | 0.031^ (100)                                           |
| NSAID       | 74.0% (672)        | 48.0% (465)     | 47.0% (302)      | 59.0% (144)      | 0.000v (462)                                                | 0.053 (142)                                                 | 0.003^ (100)                                           |
| Opiates     | 27.2% (669)        | 16.6% (465)     | 16.9% (301)      | 25.7% (144)      | 0.000v (462)                                                | 0.418 (142)                                                 | 0.001^ (100)                                           |

Denominator (responses) shown in parentheses

NSAID – non-steroidal anti-inflammatory drug

<sup>1</sup> Statistical comparisons of short term change in analgesia use (6 months post surgery) and long term change in analgesia use (2 years post surgery) with baseline analgesia use (pre-surgery) assessed using a 2-tailed sign test.

<sup>2</sup> Statistical comparison of change in analgesia use over time post treatment (between 6 months and 2 years) using a 2-tailed sign-test.

^ = statistically significant increase, v = statistically significant decrease.

Note that there is some variation in total number of responses depending on whether patients chose not to answer some questions



## STROBE Statement—checklist of items that should be included in reports of observational studies

|                              | Item No | Recommendation                                                                                                                                                                                                                                                                                                                                                                                                                                                                                                                                                                                                                                                                                                    |
|------------------------------|---------|-------------------------------------------------------------------------------------------------------------------------------------------------------------------------------------------------------------------------------------------------------------------------------------------------------------------------------------------------------------------------------------------------------------------------------------------------------------------------------------------------------------------------------------------------------------------------------------------------------------------------------------------------------------------------------------------------------------------|
| <b>Title and abstract</b>    | 1       | (a) Indicate the study's design with a commonly used term in the title or the abstract<br><b>Page 1</b><br>(b) Provide in the abstract an informative and balanced summary of what was done and what was found <b>Pages 2-3</b>                                                                                                                                                                                                                                                                                                                                                                                                                                                                                   |
| <b>Introduction</b>          |         |                                                                                                                                                                                                                                                                                                                                                                                                                                                                                                                                                                                                                                                                                                                   |
| Background/rationale         | 2       | Explain the scientific background and rationale for the investigation being reported<br><b>Pages 4-5</b>                                                                                                                                                                                                                                                                                                                                                                                                                                                                                                                                                                                                          |
| Objectives                   | 3       | State specific objectives, including any prespecified hypotheses <b>Page 5</b>                                                                                                                                                                                                                                                                                                                                                                                                                                                                                                                                                                                                                                    |
| <b>Methods</b>               |         |                                                                                                                                                                                                                                                                                                                                                                                                                                                                                                                                                                                                                                                                                                                   |
| Study design                 | 4       | Present key elements of study design early in the paper <b>Page 5</b>                                                                                                                                                                                                                                                                                                                                                                                                                                                                                                                                                                                                                                             |
| Setting                      | 5       | Describe the setting, locations, and relevant dates, including periods of recruitment, exposure, follow-up, and data collection <b>Page 5</b>                                                                                                                                                                                                                                                                                                                                                                                                                                                                                                                                                                     |
| Participants                 | 6       | (a) <i>Cohort study</i> —Give the eligibility criteria, and the sources and methods of selection of participants. Describe methods of follow-up <b>Pages 5-6</b><br><i>Case-control study</i> —Give the eligibility criteria, and the sources and methods of case ascertainment and control selection. Give the rationale for the choice of cases and controls<br><i>Cross-sectional study</i> —Give the eligibility criteria, and the sources and methods of selection of participants<br>(b) <i>Cohort study</i> —For matched studies, give matching criteria and number of exposed and unexposed<br><i>Case-control study</i> —For matched studies, give matching criteria and the number of controls per case |
| Variables                    | 7       | Clearly define all outcomes, exposures, predictors, potential confounders, and effect modifiers. Give diagnostic criteria, if applicable <b>Pages 6-8</b>                                                                                                                                                                                                                                                                                                                                                                                                                                                                                                                                                         |
| Data sources/<br>measurement | 8*      | For each variable of interest, give sources of data and details of methods of assessment (measurement). Describe comparability of assessment methods if there is more than one group <b>Pages 6-8</b>                                                                                                                                                                                                                                                                                                                                                                                                                                                                                                             |
| Bias                         | 9       | Describe any efforts to address potential sources of bias <b>Pages 8-9</b>                                                                                                                                                                                                                                                                                                                                                                                                                                                                                                                                                                                                                                        |
| Study size                   | 10      | Explain how the study size was arrived at <b>Not done – largest prospective cohort in the world by far – decision to analyse and publish once large number obtained - 5000; Not a trial so no formal sample size calculation</b>                                                                                                                                                                                                                                                                                                                                                                                                                                                                                  |
| Quantitative variables       | 11      | Explain how quantitative variables were handled in the analyses. If applicable, describe which groupings were chosen and why <b>Pages 6-8</b>                                                                                                                                                                                                                                                                                                                                                                                                                                                                                                                                                                     |
| Statistical methods          | 12      | (a) Describe all statistical methods, including those used to control for confounding <b>Pages 8-9</b><br>(b) Describe any methods used to examine subgroups and interactions <b>Pages 8-9</b><br>(c) Explain how missing data were addressed <b>Pages 8-9</b><br>(d) <i>Cohort study</i> —If applicable, explain how loss to follow-up was addressed <b>Pages 8-9</b><br><i>Case-control study</i> —If applicable, explain how matching of cases and controls was addressed<br><i>Cross-sectional study</i> —If applicable, describe analytical methods taking account of                                                                                                                                        |

1  
2 sampling strategy

---

3 (e) Describe any sensitivity analyses **Pages 8-9**

4 Continued on next page

5  
6  
7  
8  
9  
10  
11  
12  
13  
14  
15  
16  
17  
18  
19  
20  
21  
22  
23  
24  
25  
26  
27  
28  
29  
30  
31  
32  
33  
34  
35  
36  
37  
38  
39  
40  
41  
42  
43  
44  
45  
46  
47  
48  
49  
50  
51  
52  
53  
54  
55  
56  
57  
58  
59  
60

For peer review only

**Results**

|                  |     |                                                                                                                                                                                                                                                                                                                                                                                                                                                                            |
|------------------|-----|----------------------------------------------------------------------------------------------------------------------------------------------------------------------------------------------------------------------------------------------------------------------------------------------------------------------------------------------------------------------------------------------------------------------------------------------------------------------------|
| Participants     | 13* | (a) Report numbers of individuals at each stage of study—eg numbers potentially eligible, examined for eligibility, confirmed eligible, included in the study, completing follow-up, and analysed <b>Page 9</b><br>(b) Give reasons for non-participation at each stage <b>Not done - LTFU presented</b><br>(c) Consider use of a flow diagram <b>Not done – not an RCT or controlled study</b>                                                                            |
| Descriptive data | 14* | (a) Give characteristics of study participants (eg demographic, clinical, social) and information on exposures and potential confounders <b>Page 9-11</b><br>(b) Indicate number of participants with missing data for each variable of interest <b>Each variable as number of participants</b><br>(c) <i>Cohort study</i> —Summarise follow-up time (eg, average and total amount) <b>Table 2-4</b>                                                                       |
| Outcome data     | 15* | <i>Cohort study</i> —Report numbers of outcome events or summary measures over time <b>Table 1-4</b><br><i>Case-control study</i> —Report numbers in each exposure category, or summary measures of exposure<br><i>Cross-sectional study</i> —Report numbers of outcome events or summary measures                                                                                                                                                                         |
| Main results     | 16  | (a) Give unadjusted estimates and, if applicable, confounder-adjusted estimates and their precision (eg, 95% confidence interval). Make clear which confounders were adjusted for and why they were included <b>Page 9-11</b><br>(b) Report category boundaries when continuous variables were categorized <b>Not applicable</b><br>(c) If relevant, consider translating estimates of relative risk into absolute risk for a meaningful time period <b>Not applicable</b> |
| Other analyses   | 17  | Report other analyses done—eg analyses of subgroups and interactions, and sensitivity analyses <b>Page 12, Table 5</b>                                                                                                                                                                                                                                                                                                                                                     |

**Discussion**

|                  |    |                                                                                                                                                                                               |
|------------------|----|-----------------------------------------------------------------------------------------------------------------------------------------------------------------------------------------------|
| Key results      | 18 | Summarise key results with reference to study objectives <b>Pages 13 and 20</b>                                                                                                               |
| Limitations      | 19 | Discuss limitations of the study, taking into account sources of potential bias or imprecision. Discuss both direction and magnitude of any potential bias <b>Pages 13-15</b>                 |
| Interpretation   | 20 | Give a cautious overall interpretation of results considering objectives, limitations, multiplicity of analyses, results from similar studies, and other relevant evidence <b>Pages 15-16</b> |
| Generalisability | 21 | Discuss the generalisability (external validity) of the study results <b>Pages 16-17</b>                                                                                                      |

**Other information**

|         |    |                                                                                                                                                                              |
|---------|----|------------------------------------------------------------------------------------------------------------------------------------------------------------------------------|
| Funding | 22 | Give the source of funding and the role of the funders for the present study and, if applicable, for the original study on which the present article is based <b>Page 23</b> |
|---------|----|------------------------------------------------------------------------------------------------------------------------------------------------------------------------------|

\*Give information separately for cases and controls in case-control studies and, if applicable, for exposed and unexposed groups in cohort and cross-sectional studies.

**Note:** An Explanation and Elaboration article discusses each checklist item and gives methodological background and published examples of transparent reporting. The STROBE checklist is best used in conjunction with this article (freely available on the Web sites of PLoS Medicine at <http://www.plosmedicine.org/>, Annals of Internal Medicine at <http://www.annals.org/>, and Epidemiology at <http://www.epidem.com/>). Information on the STROBE Initiative is available at [www.strobe-statement.org](http://www.strobe-statement.org).
